# Supplementary material
Source: PubMed Central journal article supplement (PMC7104942)
Supplement: mmc1.pdf [file mmc1.pdf]

Cell Host & Microbe, Volume 16

## **Supplemental Information**

### **NRAV, a Long Noncoding RNA, Modulates Antiviral Responses through Suppression of Interferon-Stimulated Gene Transcription**

Jing Ouyang, Xiaomei Zhu, Yuhai Chen, Haitao Wei, Qinghuang Chen,  
Xiaojuan Chi, Baomin Qi, Lianfeng Zhang, Yi Zhao, George Fu Gao,  
Guoshun Wang, and Ji-Long Chen

# Supplemental Figures

## Figure S1

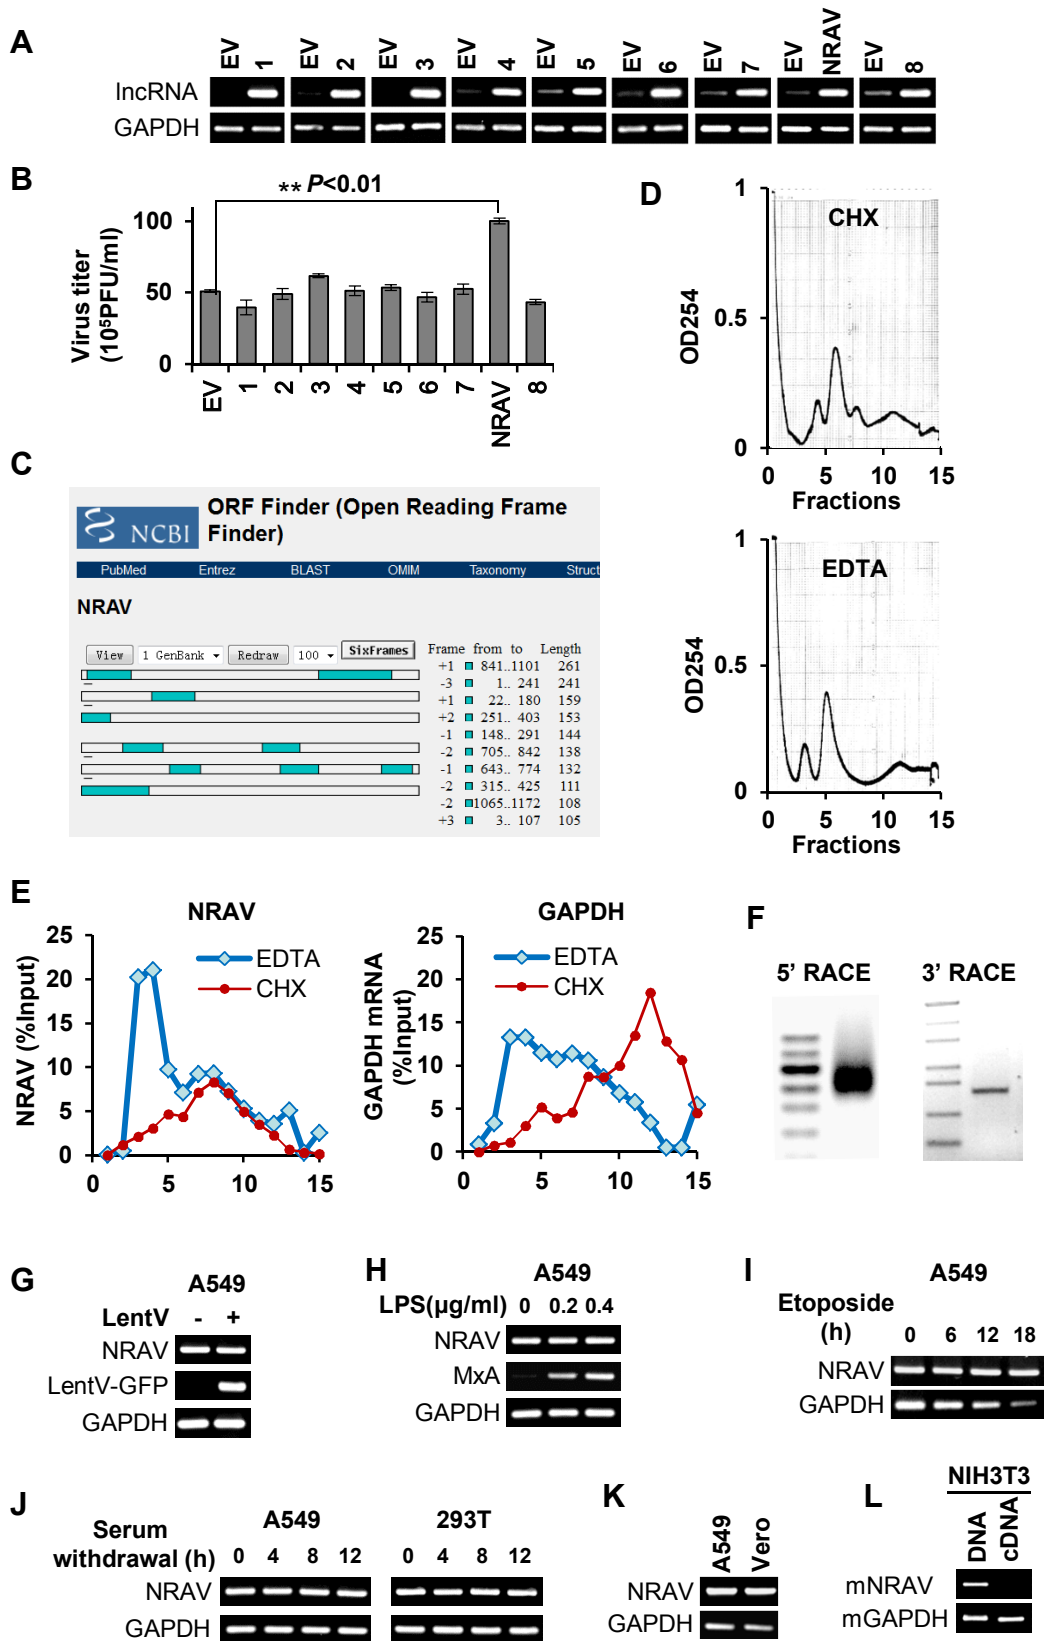

Figure S2

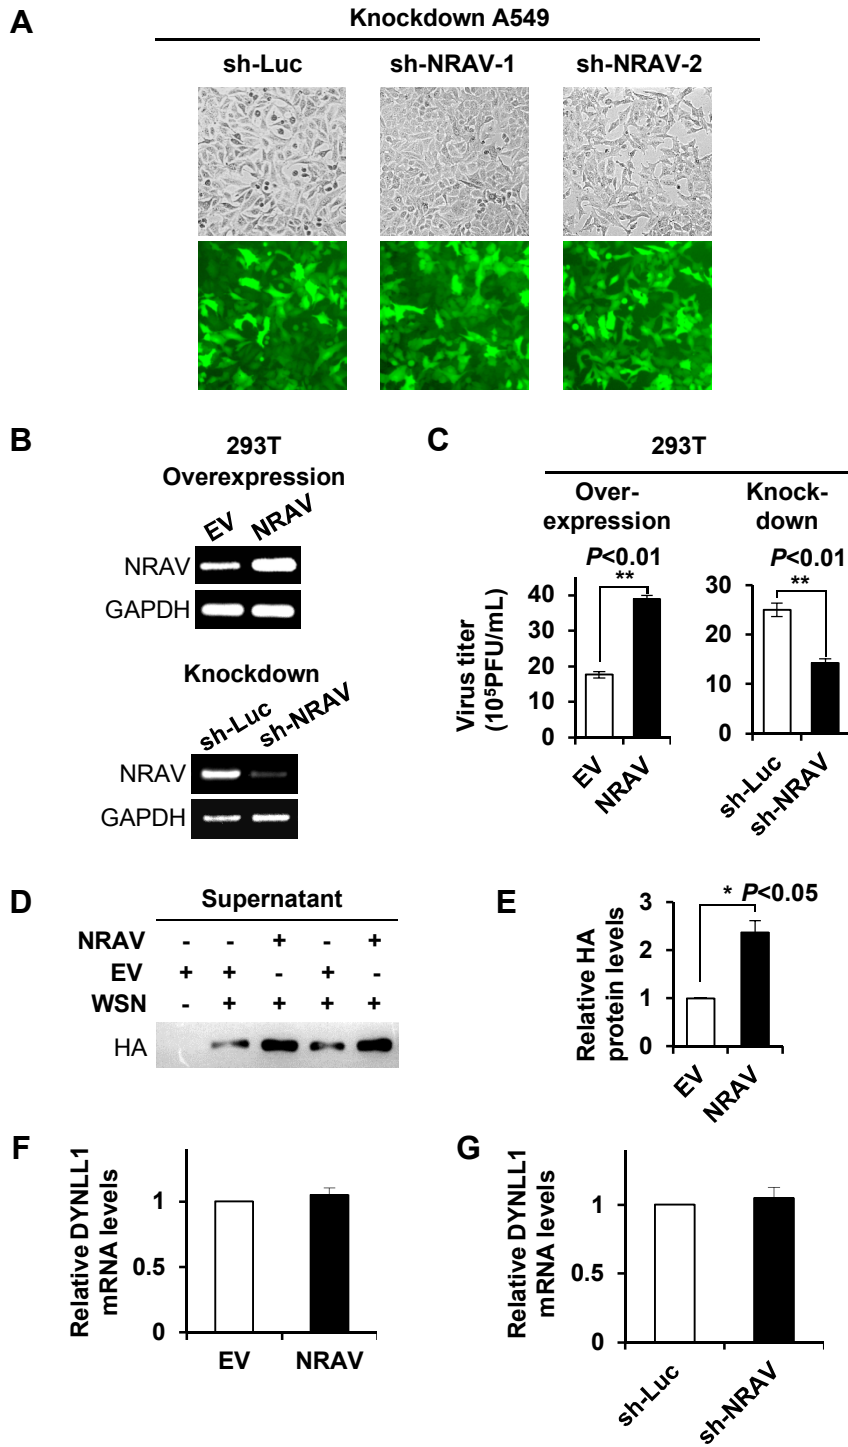

**Figure S3**

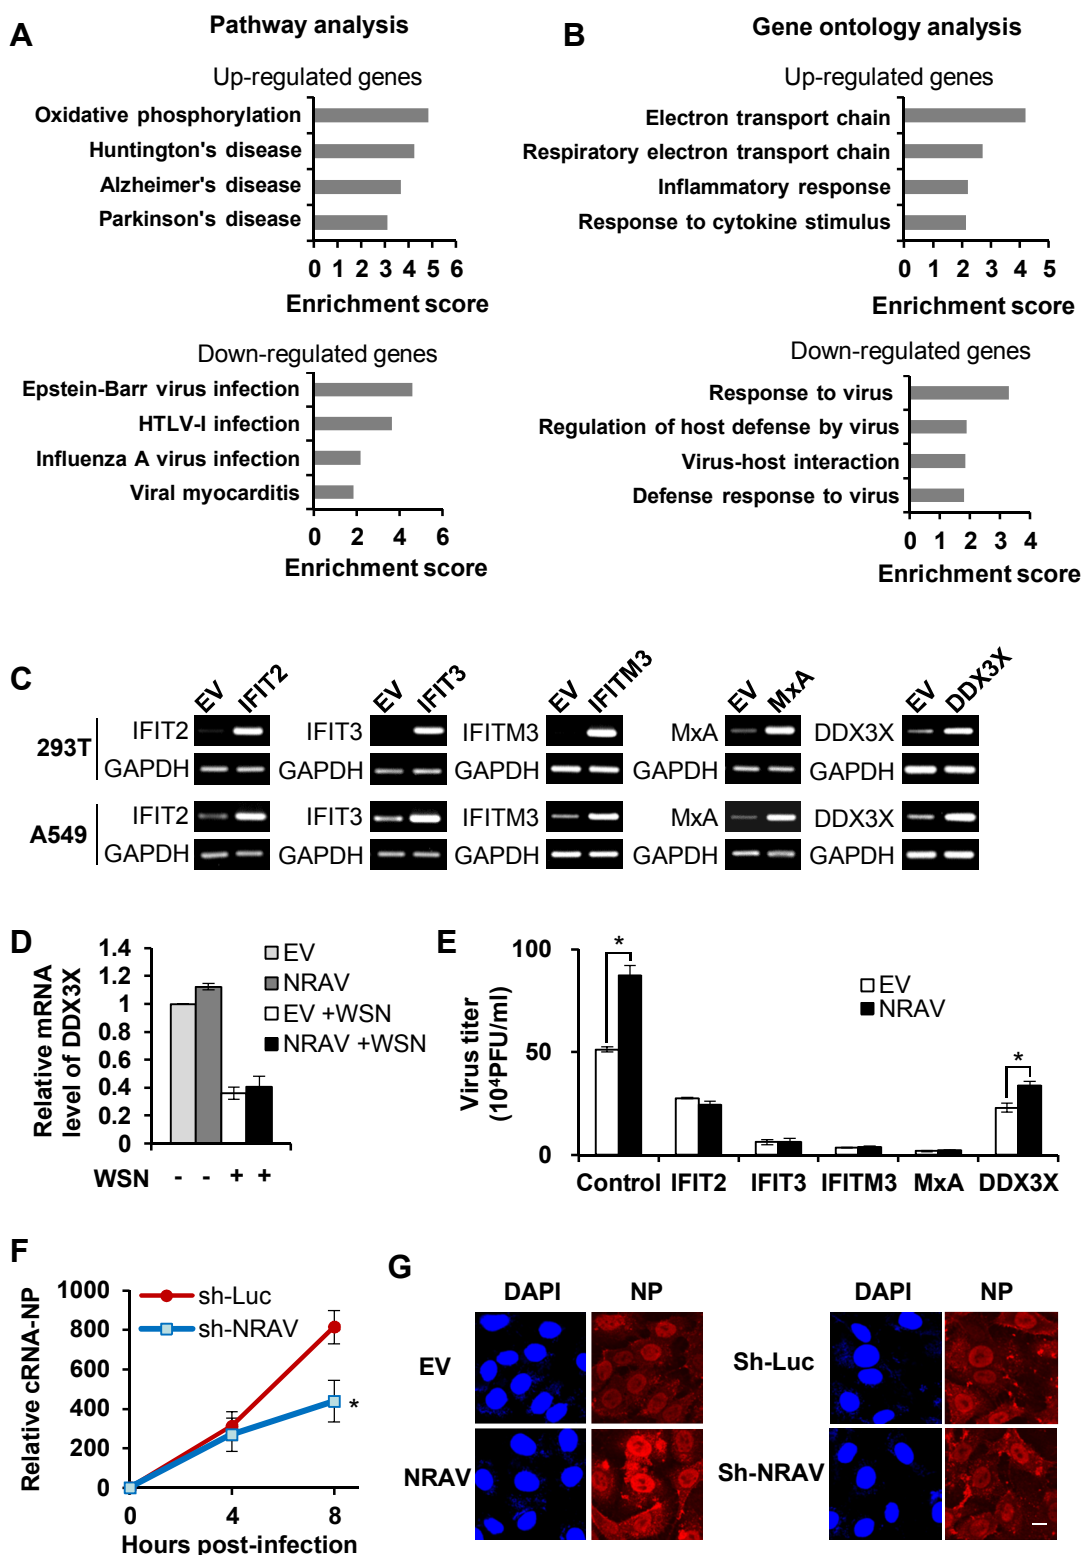

**Figure S4**

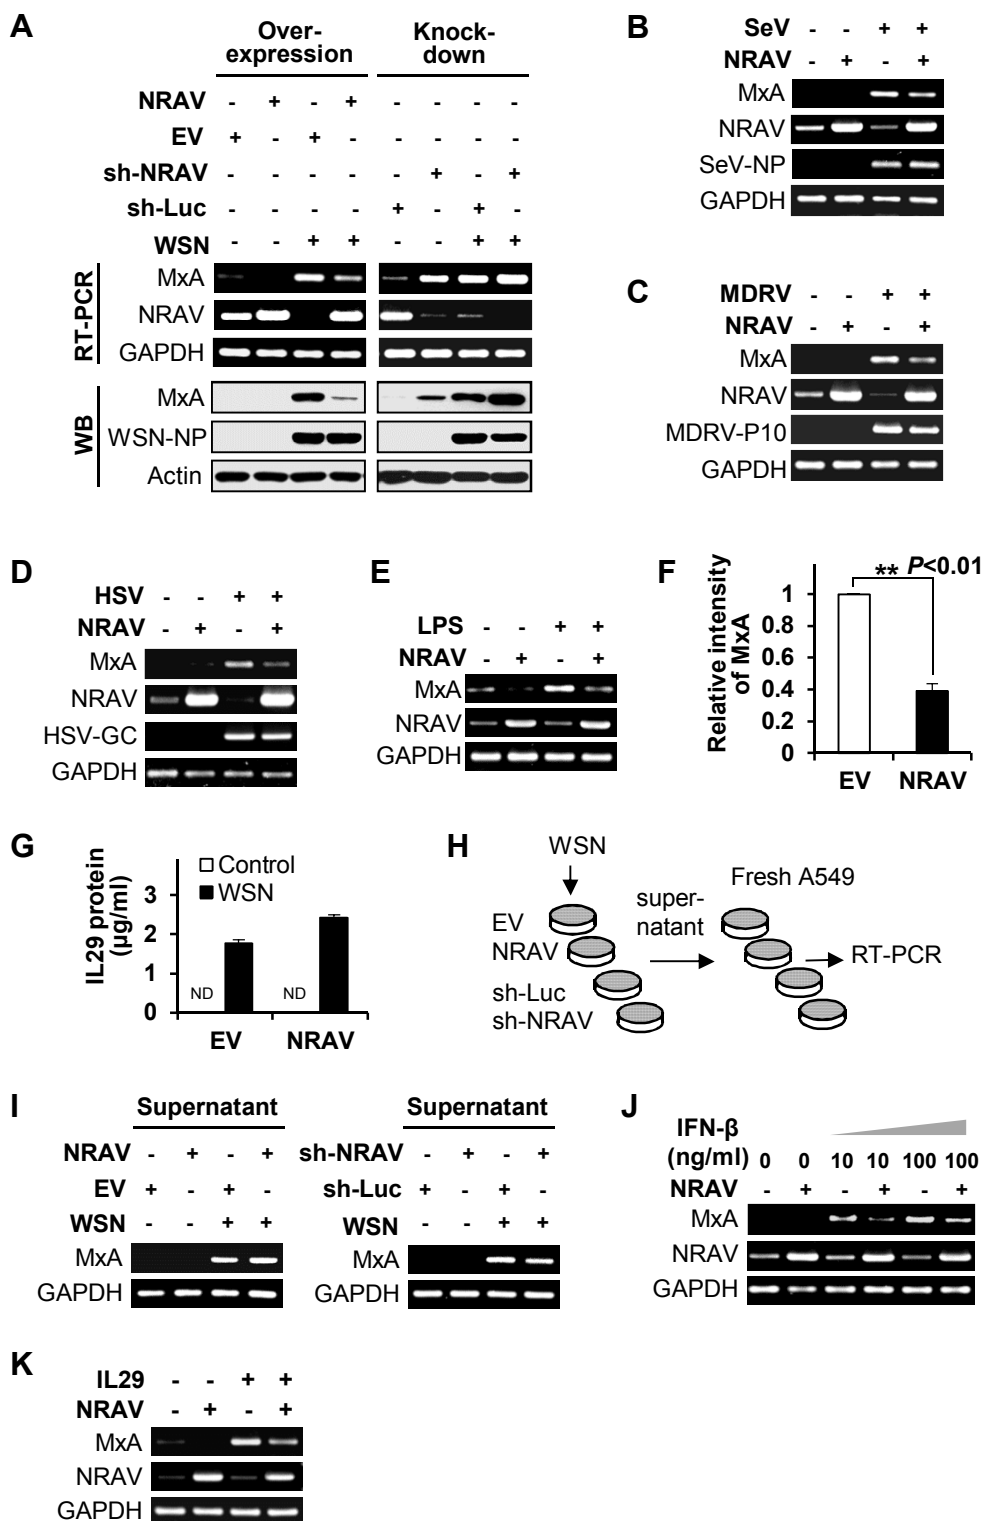

Figure S5

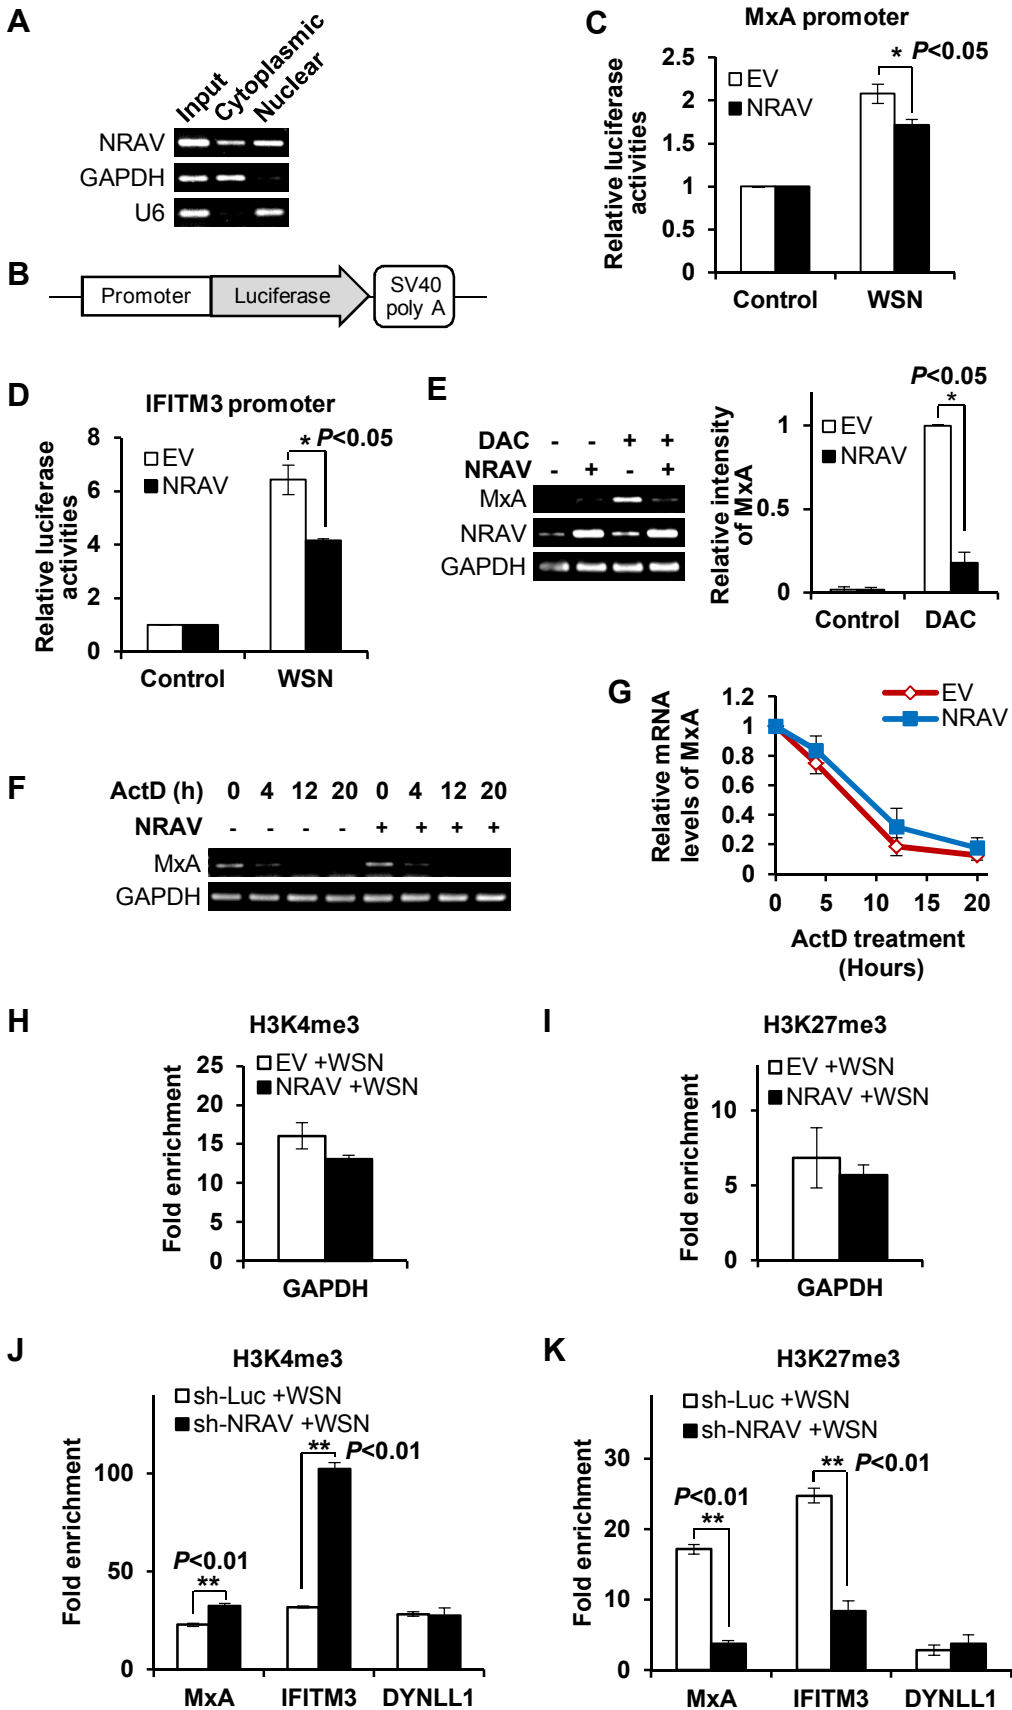

Figure S6

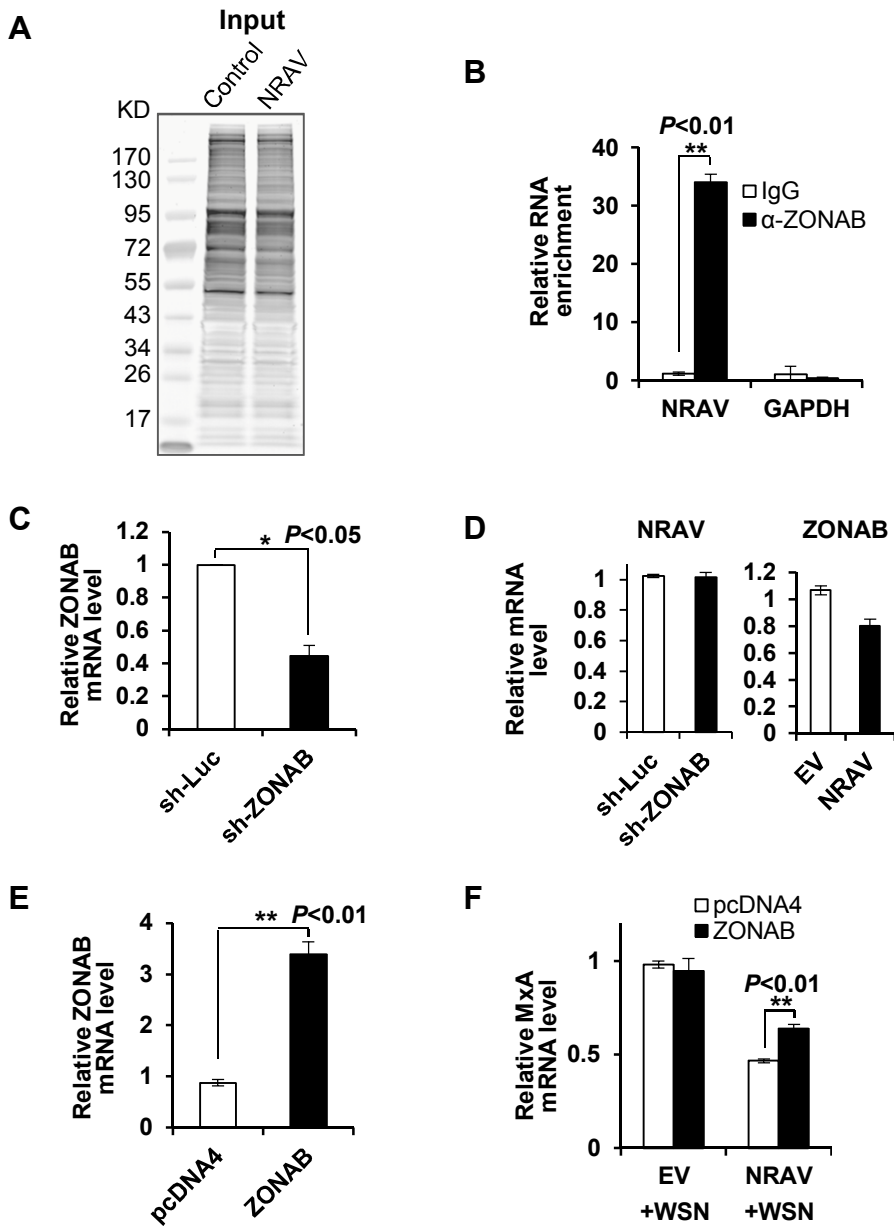

**Figure S7**

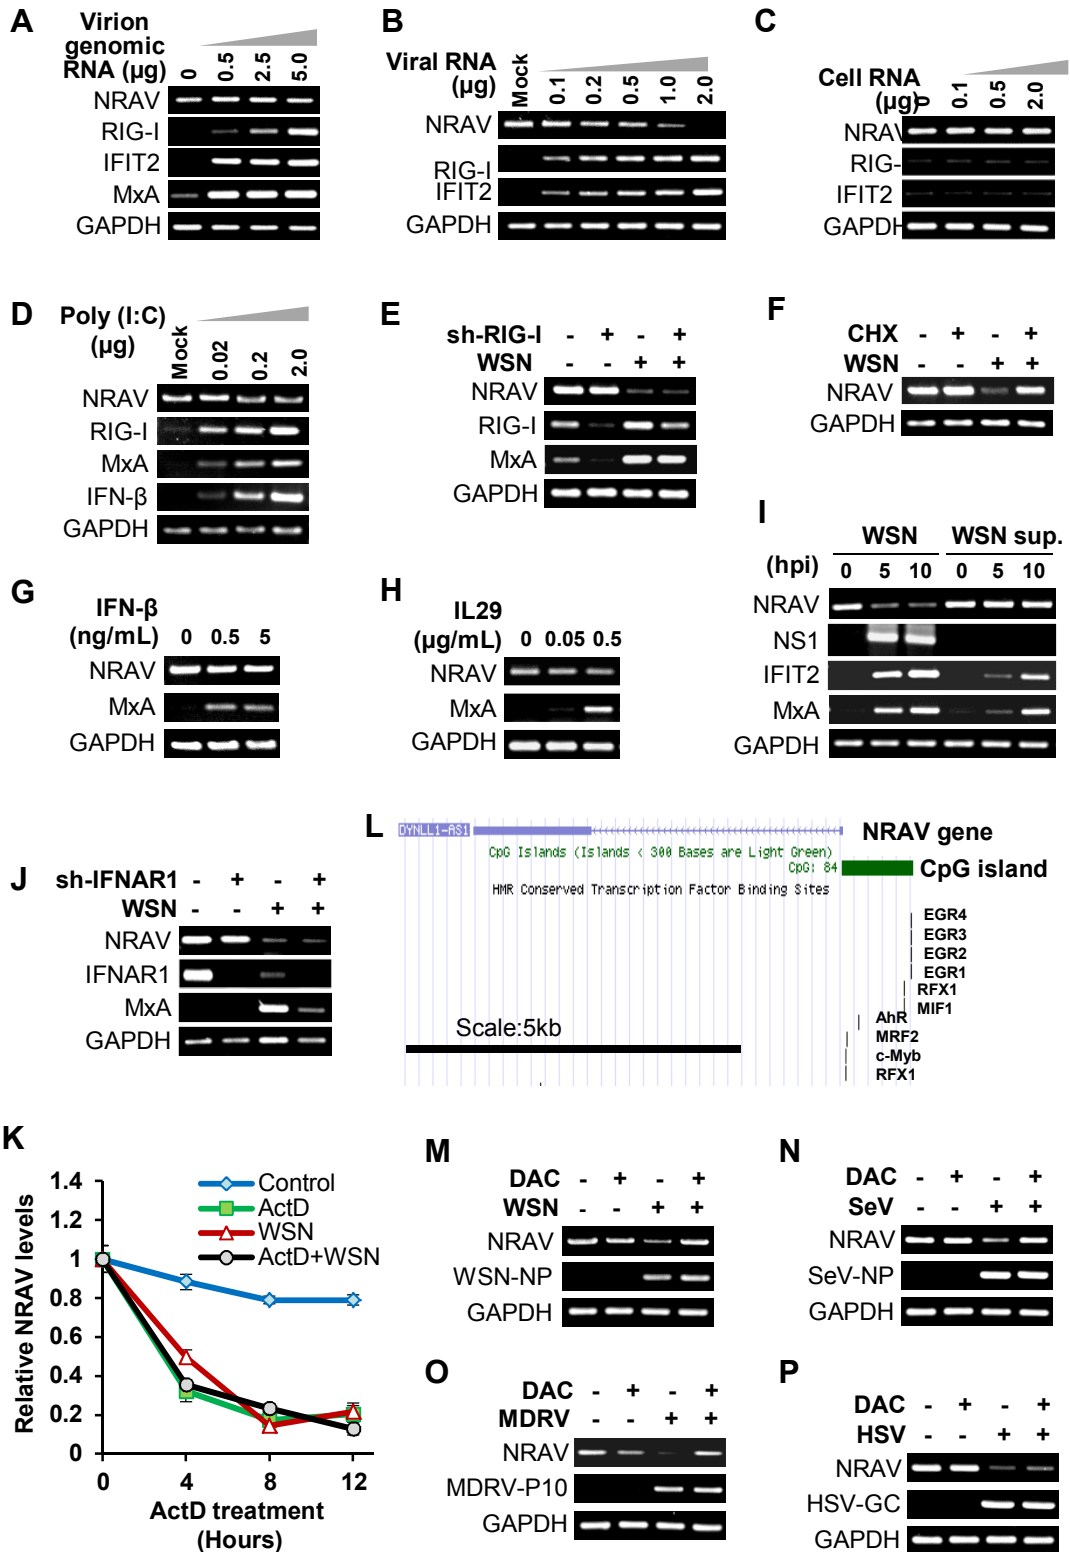



## Supplemental Information

### Supplemental Figure Legends

#### **Figure S1. Human NRAV Was Identified as a Functional LncRNA through Preliminary Functional Screening, Related to Figure 1**

(A) The overexpression efficiencies of lncRNAs in A549 cells were determined by RT-PCR. Fragments of nine lncRNAs, indicated as 1 (BI832838), 2 (GD137531), 3 (D85245), 4 (BC107859), 5 (BX089654), 6 (uc001zcp), 7 (AY927564), NRAV (uc001tyk.1), and 8 (DA418630), amplified from A549 cells were used for ectopic expression as described in **Supplemental Experimental Procedures**.

(B) The lncRNA-overexpressing cells were infected with WSN (MOI=0.3) for 16 hours. The virus titers in culture supernatants were determined through plaque forming assay. Data from three independent experiments are expressed as means±s.e.m. \*\* $P<0.01$ .

(C) LncRNA NRAV coding potential was predicted by ORF Finder as described in **Supplemental Experimental Procedures**. No ORF predicted (indicated in green) is longer than 300bp.

(D and E) Sucrose sedimentation and polysome analysis of the cytoplasmic fraction of A549. Cells incubated with cycloheximide (CHX) or mock were lysed as described in **Supplemental Experimental Procedures**. CHX-treated cell lysates were loaded on a 10-50% (weight to volume) sucrose gradient. The cytoplasmic fraction of CHX-untreated cells supplemented with 35 mM EDTA was also loaded on a sucrose gradient. After centrifugation, samples were fractionated from the top of the gradient

into 15 tubes while the absorbance at 254nm (OD<sub>254</sub>) was measured (D). RNA levels from each fraction were analyzed by qRT-PCR. Relative levels of NRAV (E, *left*) and GAPDH mRNA (E, *right*) are shown as %Input. Representative results from three independent experiments were shown.

(F) Agarose gel analysis of 5' and 3' RACE PCR products. DNA ladders (100, 200, 300, 400, 500, 600, and 700 bp) are shown (left lane).

(G-J) A549 cells were transduced with pseudovirus (LentV) prepared by lentivirus expression system (G), or incubated with LPS (100 ng/ml, Invivogen) and sCD14 (300 ng/ml, PeproTech) for 8 h (H), or treated with etoposide (100  $\mu$ M, Sigma) (I), or cultured in serum-free media for indicated time (J). The expression of NRAV were determined by RT-PCR.

(K) The expressions of NRAV in African green monkey kidney (Vero) cells and human A549 cells were detected by RT-PCR.

(L) The mouse DNA and cDNA prepared from NIH3T3 cells were used as templates to amplify mouse NRAV homolog (mNRAV).

These results shown are representative of at least three independent experiments.

**Figure S2. Altering NRAV Expression Has Profound Effects on IAV Replication in Human Cells, Related to Figure 2**

(A) Shown are representative phase and fluorescent images of NRAV knockdown A549 cells.

(B) The overexpression and knockdown of NRAV in 293T cells were determined by

RT-PCR. Representative results of three independent experiments are shown.

(C) Influenza virus replication was examined in NRAV-overexpressing and NRAV knockdown 293T cells by plaque forming assay as described in Figure 2E (MOI=0.3,  $n=3$ , means $\pm$ s.e.m.) and **Supplemental Experimental Procedures**.

(D) IAV protein HA in supernatants from infected NRAV-overexpressing A549 cells (MOI=1) were detected by Western blotting. Supernatants of same volume at 16 hpi were collected and loaded parallelly. Representative results of three independent experiments are shown.

(E) The protein levels of HA in (D) lane 2 to lane5 were relatively quantitated by densitometry and normalized to GAPDH levels. In each experiment, the level of HA in infected EV control group is 1. Plotted are the average levels from three independent experiments (means $\pm$ s.e.m.).

(F and G) The expression of DYNLL1 in NRAV-overexpression (F) and knockdown cells (G) were determined by qRT-PCR ( $n=3$ , means $\pm$ s.e.m.).

**Figure S3. NRAV Acts as a Negative Regulator to Modulate the Expression of Several Key ISGs, Related to Figure 4**

(A and B) Pathway analysis (A) and Gene Ontology analysis (B) of up-regulated genes (*upper*) and down-regulated genes (*lower*) from microarray data indicated that many decreased genes were associated with viral infection or host response to virus. Enrichment score is calculated as  $-\log_{10}(P\text{-value})$ , and  $P$ -value is calculated by Fisher's exact test.

(C) The transient expression of exogenous human IFIT2, IFIT3, IFITM3, MxA or DDX3X in experiments was determined by RT-PCR at 24 hours post-transfection. For each experiment, 1  $\mu$ g expression plasmid is used for transfection (6 well plate). Representative results of three independent experiments are shown.

(D) The DDX3X mRNA levels in NRAV and EV cells were measured by qRT-PCR ( $n=3$ , means $\pm$ s.e.m.), which was not significantly affected by NRAV overexpression.

(E) Transient expressions of ISGs were performed in NRAV-overexpressing cells or EV cells as described in **Supplemental Experimental Procedures**. 24 hours after transfection, cells were infected with IAV for 16 hours. The virus titers were determined by plaque forming assay ( $n=3$ ). The empty plasmid was used as control, as well as the expression plasmid of DDX3X.

(F) Viral cRNA of WSN-NP in infected NRAV knockdown cells (MOI=1) were detected by qRT-PCR. Data are shown as means $\pm$ s.e.m. ( $n=3$ ). \* $P < 0.05$ .

(G) A549 cells stably expressing NRAV or sh-NRAV or controls were incubated with WSN virus (MOI=100) on ice, and then cultured with warm media for 4 h. Immunofluorescence staining was performed using an anti-NP antibody to detect entry of NP (red). The nuclei were stained with DAPI (blue). Scale bar, 10  $\mu$ m.

**Figure S4. NRAV Suppresses the Transcription of MxA without Affecting IFN Signaling, Related to Figure 5**

(A) The MxA mRNA (upper) and protein (lower) levels in NRAV-overexpressing or NRAV knockdown cells infected or uninfected with WSN (MOI=3) were measured

by RT-PCR and Western blotting, respectively. Empty vector or sh-Luc expressing plasmid are used as control.

(B-D) The MxA mRNA levels in following NRAV-overexpressing cells or EV control cells were determined by RT-PCR: SeV infected A549 cells (B), MDRV infected 293T cells (C), and HSV infected A549 cells (D). Representative results of three independent experiments are shown.

(E) The MxA mRNA levels in NRAV-overexpressing cells or EV control cells stimulated by LPS (100 ng/ml) and sCD14 (300 ng/ml) were determined by RT-PCR.

(F) Levels of MxA mRNA in (E) lane 3 and lane 4 were quantitated by densitometry as described in Figure S2E. Plotted are the average levels from three independent experiments (means $\pm$ s.e.m.).

(G) The IL29 protein levels in supernatants of EV and NRAV cells infected with or without WSN (MOI=1) were analyzed by ELISA. Data are shown as means $\pm$ s.e.m.  $n=3$ .

(H) Experimental schematic of cytokine assay. NRAV-overexpressing or NRAV knockdown A549 cells and control cells were infected with or without WSN (MOI=1). The supernatants of above cells were collected at 8 hpi and used to incubate the fresh A549 cells for 1.5 hours.

(I) The MxA mRNA levels in supernatant-incubated cells described in (H) were assessed by RT-PCR. Representative results of three independent experiments are shown.

(J and K) The MxA mRNA levels in NRAV-overexpressing cells and control cells

stimulated by IFN- $\beta$  (J) or IL29 (K) (50 ng/ml) respectively for 3 h were detected by RT-PCR. Representative results of three independent experiments are shown.

Cells were infected or stimulated as described in **Experimental Procedures**. Data are shown as means $\pm$ s.e.m.  $n=3$ . \* $P<0.05$ , \*\* $P<0.01$ .

**Figure S5. NRAV Regulates Promoter Activities and Histone Modifications of ISGs, Related to Figure 6**

(A) The RNA levels of NRAV, cytoplasmic control transcript (GAPDH mRNA) and nuclear control transcript (U6 RNA) were assessed by RT-PCR in cytoplasmic and nuclear fractions from A549. The total cells were used as input control.

(B) Shown is the schematic diagram of the plasmid construct for luciferase gene reporter assay.

(C and D) 293 T cells overexpressing NRAV or EV control were transfected with pGL3-MxAP-Luc (C) or pGL3-IFITM3P-Luc (D) in combination with pRL-TK for 10 h and then infected with WSN for 12 h as described in **Supplemental Experimental Procedures**. Luciferase activity in cell lysates was measured and displayed as mean $\pm$ s.e.m. of relative luciferase units normalized to Renilla luciferase activity from three independent experiments.

(E) A549 cells overexpressing NRAV were treated with 10  $\mu$ M decitabine (DAC) as described in **Supplemental Experimental Procedures** and infected with WSN (MOI=3) for 12 h. The mRNA levels of MxA were detected by RT-PCR (*left*). Levels of MxA mRNA were relatively quantitated by densitometry (*right*) as described in

Figure S2E. Plotted are the average levels from three independent experiments.

(F and G) A549 cells overexpressing NRAV were infected with WSN and treated with 2.5 µg/ml actinomycin D (ActD) as described in **Supplemental Experimental Procedures**. Cells were collected at 0, 4, 12, 20 h time points. The mRNA levels of MxA were detected by RT-PCR (F) and qRT-PCR (G).

(H and I) ChIP analysis of H3K4me3 (H) and H3K27me3 (I) levels at the *gapdh* locus in infected NRAV-overexpressing or control A549 cells as described in Figure 6F and **Supplemental Experimental Procedures**.

(J and K) ChIP analysis of H3K4me3 (J) and H3K27me3 (K) levels at the *mxA*, *ifitm3* and *dynll1* locus in infected NRAV knockdown or control A549 cells.

Representative results of three independent RT-PCR experiments are shown. Data of are shown as means±s.e.m. ( $n=3$ , \* $P<0.05$ , \*\* $P<0.01$ ).

### **Figure S6. Interaction between NRAV and ZONAB and the Function of ZONAB on MxA Transcription, Related to Figure 6**

(A) Silver staining of input proteins of RNA pulldown assay as described in Figure 6H and **Supplemental Experimental Procedures**. Shown is representative result from three independent experiments.

(B) The association of NRAV with ZONAB is verified by RNA immunoprecipitation (RIP). Uninfected cell lysates were immunoprecipitated with anti-ZONAB Ab or control IgG as described in **Supplemental Experimental Procedures**. The enrichments of NRAV or GAPDH mRNA were analyzed by qRT-PCR and

normalized to input and control IgG. The fold enrichment was calculated as  $2^{(-\Delta\Delta Ct)}$ .

(C) ZONAB was depleted by shRNA sequences through transient transfection with A549 cells. ZONAB mRNA levels were measured by qRT-PCR and normalized to that of control sh-Luc cells.

(D) NRAV expression in ZONAB depleted cells (*left*) as described in (C) and ZONAB mRNA levels in NRAV-overexpressing A549 cells (*right*) were determined by qRT-PCR and normalized to that of control sh-Luc/EV cells respectively.

(E) ZONAB isoform b was transiently expressed in A549 cells by transfecting with transient expression plasmid containing ZONAB isoform b ORF. The mRNA levels were measured by qRT-PCR and normalized to that of control cells transfected with empty vector pcDNA4.

(F) MxA mRNA levels in IAV-infected NRAV-overexpressing A549 cells and EV control cells transfected with transient expression plasmids containing ZONAB isoform b ORF or empty vector pcDNA4 were determined by qRT-PCR and normalized to that of infected EV cells transfected with pcDNA4.

Data are shown as means $\pm$ s.e.m. (n=3. \*P<0.05, \*\*P<0.01).

**Figure S7. Down-regulation of NRAV Is Dependent on Virus Replication, Protein Synthesis and Epigenetic Regulation, Related to Figure 6 and Discussion**

RT-PCR was performed to examine the RNA expression in following A549 cells:

(A-D) Cells were transfected with WSN virion genomic RNA (A), viral RNA isolated from WSN infected cells (B), cellular RNA derived from uninfected cells (C) and



poly(I:C) (D) of indicated amount for 4 hours. IAV genomic RNA could not affect the NRAV level. By contrast, transfection with viral RNA from IAV infected cells caused marked reduction in NRAV expression. The treatment with poly(I:C) had no effect on NRAV expression.

(E) RIG-I knockdown A549 cells generated using specific shRNA targeting RIG-I as described in **Supplemental Experimental Procedures** were infected with WSN. The depletion of RIG-I had no effect on NRAV expression.

(F) Cells were treated with 1 µg/ml cycloheximide (CHX) for 30 min before WSN infection. The NRAV level recovered greatly in CHX-pretreated and WSN-infected cells.

(G-I) Cells were stimulated with cytokines IFN-β (G), IL29 (type III IFN) (H) of indicated amount or incubated with culture supernatant (sup.) collected from infected cells (I) for 4 hours. In (I), infected cells were used as control. These virus-induced cytokines could not affect the NRAV level.

(J) The type I IFN receptor IFNAR1 knockdown cells generated using specific shRNA (InvivoGen) were infected with WSN. The depletion of IFNAR1 had no effect on NRAV expression.

(K) NRAV RNA decay assay was performed with actinomycin (ActD) treatment of A549 cells infected with WSN (MOI=3) or not. Cells were collected at 0, 4, 8, 12h time points and the NRAV levels were determined by qRT-PCR described in **Supplemental Experimental Procedures** (means±s.e.m. n=3). The turnover rate of NRAV in infected cells did not show difference with that in uninfected cells.

(L) Predicted CpG island in NRAV promoter region and binding sites of transcription factors are shown. Prediction data were from UCSC genome browser database (February 2009 human reference sequence (GRCh37), <http://genome.ucsc.edu>). Scale bar: 5kb.

(M-P) Cells were treated with 10  $\mu$ M DNA methyltransferase inhibitor decitabine (DAC) for 2 days before infection with WSN (M), SeV (N), MDRV (O) and HSV (P) as described in **Supplemental Experimental Procedures**. Shown are representative results from three independent experiments. The NRAV levels were obviously recovered in cells pretreated with DAC and infected with IAV, SeV, and MDRV, but less significant in DNA virus HSV infected cells.

**Table S1. Full-length sequence of NRAV, Related to Figure 1**

---

| NRAV                                                                                                                                                                                                                                                                                                                                                                                                                                                                                                                                                                                                                                                                                                                                                                                                                                                                                                                                                                                                                                                                                                                                                                                                                                                                                                          |
|---------------------------------------------------------------------------------------------------------------------------------------------------------------------------------------------------------------------------------------------------------------------------------------------------------------------------------------------------------------------------------------------------------------------------------------------------------------------------------------------------------------------------------------------------------------------------------------------------------------------------------------------------------------------------------------------------------------------------------------------------------------------------------------------------------------------------------------------------------------------------------------------------------------------------------------------------------------------------------------------------------------------------------------------------------------------------------------------------------------------------------------------------------------------------------------------------------------------------------------------------------------------------------------------------------------|
| GGGCAATGGGCCGCACGCTACGAGGCCACACACCCAGAAGGTGGAGCCCCGGCCGGGTT<br>ACGCGGACCACCCAGCTGTCTGGAGAGATGAAGAAAATGAGGTTCAAAGAGATGAAGTCT<br>CTTGCCTAAAGTCAGTGACAGAAAGTGACAGAGCTGGGATGTGAATCCTGGTCTGACTCTA<br>CAGTCCCACATGGTAGATGGAACCTCCGAGCAACACCTAAACAAAGGGAGTTGATGCCTCC<br>GAACAGAGTAATGTCGCTGGAGACACTAAGCATCGTCGGCCCCTGGCAGGAGCTCCCTAAA<br>TATGTGTTGGATGGATGGAAGAAAGGATGGATAGTTCAGAGTACTTCAGCCTTGATTCTCC<br>GCAACAGACACCTGAAACTTGACCCTACATTGGTTCTTGGCCATCGTGATCTTCCTTGACA<br>GAATCACCTTTCAGCTCCGGTCATCAGACTTCCCAGGGCCCTCAGAAAGCCCTTCAGAGT<br>TGTTACTCACAGGCAGGCTGAGGGATTCTTACGGGGTCTGCAGCTCTCCTCACCTCATCCA<br>CAAGTAGGACCGTGGCCTGTTCCCTACTACTGCCCCAGGATCACTCTGTTCCCAGCCCAGT<br>CCAGCAATCACTTGTCTAGCTTTCTGGAACCTTGAGTACTTTCTTGAACCATGAGTCCTGTG<br>ACCACCCTAGCAGCTCTAACCCCTCCCTTATCTGAAAGGAAGTGTGAGGTGACCTTGCAGGT<br>CCCAGAGTTGATTGAAGACCCCATCCAGAAAGAAGGCACCCTGTGGGAGAGATTGCAAGG<br>CCTAGGTCTGAATCCGGAAGCTTCCACCCCATGGAGAAGGGCTGGCACCAGCCTGGGGCT<br>GGCAGTGGAGCTGAGCTTTGGAGCCAAGGACTGTACTGCAGTGCAGGGAGAGTGAGGCCA<br>GAAAGGCTGAGACAACCTCAGGGAAAGAAAACCTCCCTTCTGGCTAATAGTCAAGCACCGC<br>CTGAGTAGACCAACACTCTCCTGTCCACAGGGGCAGCAGATGAAGACACAACCAGAGAGG<br>ACTAACAGGCCCCCTCAGCTCTCAGTCAGAGGGCAGAGCAACACAGAATAGACATTAAAG<br>GAACAGACTTTGAGGCCAGGCAGCCTTGGGTGTGCATCTGTCCCTACTAAGCCATGTGACA<br>TAAACAAGTGAGTCCACCTCAAAAAAAAAAAAA |

---

The full-length sequence of NRAV is combined the end sequences of NRAV determined by 5' and 3' RACE and the middle fragment sequence of NRAV cloned from cDNAs of A549 cells by RT-PCR.

**Table S2. ISGs Differentially Expressed in NRAV-overexpressing Cells, Related to Figure 4**

**Down-regulated ISGs**

| <b>Entrez Gene ID</b> | <b>Gene Symbol</b> | <b>Description</b>                                                                                                                                                                                                                                          |
|-----------------------|--------------------|-------------------------------------------------------------------------------------------------------------------------------------------------------------------------------------------------------------------------------------------------------------|
| 3433                  | IFIT2              | Interferon-induced protein with tetratricopeptide repeats 2 (IFIT-2) (Interferon-induced 54 kDa protein) (IFI-54K) (ISG-54 K). [Source:Uniprot/SWISSPROT;Acc:P09913]                                                                                        |
| 3437                  | IFIT3              | Interferon-induced protein with tetratricopeptide repeats 3 (IFIT-3) (IFIT-4) (Interferon-induced 60 kDa protein) (IFI-60K) (ISG-60) (CIG49) (Retinoic acid-induced gene G protein) (RIG-G). [Source:Uniprot/SWISSPROT;Acc:O14879]                          |
| 144383                | IFITM3             | Interferon-induced transmembrane protein 3 (Interferon-inducible protein 1-8U). [Source:Uniprot/SWISSPROT;Acc:Q01628]                                                                                                                                       |
| 8638                  | OASL               | 59 kDa 2-5-oligoadenylate synthetase-like protein (p59 OASL) (p59OASL) (Thyroid receptor-interacting protein 14) (TRIP-14). [Source:Uniprot/SWISSPROT;Acc:Q15646]                                                                                           |
| 4599                  | MX1                | Interferon-induced GTP-binding protein Mx1 (Interferon-regulated resistance GTP-binding protein MxA) (Interferon-induced protein p78) (IFI-78K). [Source:Uniprot/SWISSPROT;Acc:P20591]                                                                      |
| 58                    | ACTA1              | Actin, alpha skeletal muscle (Alpha-actin-1). [Source:Uniprot/SWISSPROT;Acc:P68133]                                                                                                                                                                         |
| 8125                  | ANP32A             | Acidic leucine-rich nuclear phosphoprotein 32 family member A (Potent heat-stable protein phosphatase 2A inhibitor I1PP2A) (Acidic nuclear phosphoprotein pp32) (Leucine-rich acidic nuclear protein) (Lanp) (Putative HLA-DR-associated protein I) (PHAPI) |
| 9582                  | APOBEC3B           | Probable DNA dC->dU-editing enzyme APOBEC-3B (EC 3.5.4.-) (Phorbolin- 1-related protein) (Phorbolin-2/3). [Source:Uniprot/SWISSPROT;Acc:Q9UH17]                                                                                                             |
| 23780                 | APOL2              | Apolipoprotein-L2 (Apolipoprotein L-II) (ApoL-II). [Source:Uniprot/SWISSPROT;Acc:Q9BQE5]                                                                                                                                                                    |
| 808                   | CALM3              | Calmodulin (CaM). [Source:Uniprot/SWISSPROT;Acc:P62158]                                                                                                                                                                                                     |
| 824                   | CAPN2              | Calpain-2 catalytic subunit precursor (EC 3.4.22.53) (Calpain-2 large subunit) (Calcium-activated neutral proteinase 2) (CANP 2) (Calpain M- type) (M-calpain) (Millimolar-calpain) (Calpain large polypeptide L2). [Source:Uniprot/SWISSPROT;Acc:P17655]   |
| 6352                  | CCL5               | Small inducible cytokine A5 precursor (CCL5) (T-cell-specific RANTES protein) (SIS-delta) (T cell-specific protein P228) (TCP228) [Contains: RANTES(3-68); RANTES(4-68)]. [Source:Uniprot/SWISSPROT;Acc:P13501]                                             |
| 894                   | CCND2              | G1/S-specific cyclin-D2. [Source:Uniprot/SWISSPROT;Acc:P30279]                                                                                                                                                                                              |
| 972                   | CD74               | HLA class II histocompatibility antigen gamma chain (HLA-DR antigens- associated invariant chain) (Ia antigen-associated invariant chain) (Ii) (p33) (CD74 antigen). [Source:Uniprot/SWISSPROT;Acc:P04233]                                                  |
| 991                   | CDC20              | Cell division cycle protein 20 homolog (p55CDC). [Source:Uniprot/SWISSPROT;Acc:Q12834]                                                                                                                                                                      |
| 1026                  | CDKN1A             | Cyclin-dependent kinase inhibitor 1 (p21) (CDK-interacting protein 1) (Melanoma differentiation-associated protein 6) (MDA-6). [Source:Uniprot/SWISSPROT;Acc:P38936]                                                                                        |
| 7812                  | CSDE1              | Cold shock domain-containing protein E1 (UNR protein) (N-ras upstream gene protein). [Source:Uniprot/SWISSPROT;Acc:O75534]                                                                                                                                  |
| 1520                  | CTSS               | Cathepsin S precursor (EC 3.4.22.27). [Source:Uniprot/SWISSPROT;Acc:P25774]                                                                                                                                                                                 |
| 1832                  | DSP                | Desmoplakin (DP) (250/210 kDa paraneoplastic pemphigus antigen). [Source:Uniprot/SWISSPROT;Acc:P15924]                                                                                                                                                      |

|        |             |                                                                                                                                                                                                                                                          |
|--------|-------------|----------------------------------------------------------------------------------------------------------------------------------------------------------------------------------------------------------------------------------------------------------|
| 1843   | DUSP1       | Dual specificity protein phosphatase 1 (EC 3.1.3.48) (EC 3.1.3.16) (MAP kinase phosphatase 1) (MKP-1) (Protein-tyrosine phosphatase CL100) (Dual specificity protein phosphatase hVH1). [Source:Uniprot/SWISSPROT;Acc:P28562]                            |
| 10682  | EBP         | 3-beta-hydroxy steroid-Delta(8),Delta(7)-isomerase (EC 5.3.3.5) (Cholestenol Delta-isomerase) (Delta(8)-Delta(7) sterol isomerase) (D8-D7 sterol isomerase) (Emopamil-binding protein). [Source:Uniprot/SWISSPROT;Acc:Q15125]                            |
| 1975   | EIF4B       | Eukaryotic translation initiation factor 4B (eIF-4B). [Source:Uniprot/SWISSPROT;Acc:P23588]                                                                                                                                                              |
| 2048   | EPHB2       | Ephrin type-B receptor 2 precursor (EC 2.7.10.1) (Tyrosine-protein kinase receptor EPH-3) (DRT) (Receptor protein-tyrosine kinase HEK5) (ERK) (Tyrosine-protein kinase TYRO5) (Renal carcinoma antigen NY-REN-47). [Source:Uniprot/SWISSPROT;Acc:P29323] |
| 3170   | FOXA2       | Hepatocyte nuclear factor 3-beta (HNF-3B) (Forkhead box protein A2). [Source:Uniprot/SWISSPROT;Acc:Q9Y261]                                                                                                                                               |
| 2294   | FOXF1       | Forkhead box protein F1 (Forkhead-related protein FKHL5) (Forkhead-related transcription factor 1) (FREAC-1) (Forkhead-related activator 1). [Source:Uniprot/SWISSPROT;Acc:Q12946]                                                                       |
| 23710  | GABARAPL3   | Gamma-aminobutyric acid receptor-associated protein-like 1 (GABA(A) receptor-associated protein-like 1) (Glandular epithelial cell protein 1) (GEC-1) (Early estrogen-regulated protein). [Source:Uniprot/SWISSPROT;Acc:Q9H0R8]                          |
| 2821   | GPI         | Glucose-6-phosphate isomerase (EC 5.3.1.9) (GPI) (Phosphoglucose isomerase) (PGI) (Phosphohexose isomerase) (PHI) (Neuroleukin) (NLK) (Sperm antigen 36) (SA-36). [Source:Uniprot/SWISSPROT;Acc:P06744]                                                  |
| 2987   | GUK1        | Guanylate kinase (EC 2.7.4.8) (GMP kinase). [Source:Uniprot/SWISSPROT;Acc:Q16774]                                                                                                                                                                        |
| 3054   | HCFC1       | Host cell factor (HCF) (HCF-1) (C1 factor) (VP16 accessory protein) (VCAF) (CFF)                                                                                                                                                                         |
| 3105   | HLA-A       | HLA class I histocompatibility antigen, A-3 alpha chain precursor (MHC class I antigen A*3). [Source:Uniprot/SWISSPROT;Acc:P04439]                                                                                                                       |
| 730410 | 1B18_HUMAN  | HLA class I histocompatibility antigen, B-18 alpha chain precursor (MHC class I antigen B*18). [Source:Uniprot/SWISSPROT;Acc:P30466]                                                                                                                     |
| 3107   | 1C07_HUMAN  | HLA class I histocompatibility antigen, Cw-7 alpha chain precursor (MHC class I antigen Cw*7). [Source:Uniprot/SWISSPROT;Acc:P10321]                                                                                                                     |
| 3133   | NP_005507.3 | major histocompatibility complex, class I, E precursor [Source:RefSeq_peptide;Acc:NP_005507]                                                                                                                                                             |
| 3135   | HLA-G       | HLA class I histocompatibility antigen, alpha chain G precursor (HLA G antigen). [Source:Uniprot/SWISSPROT;Acc:P17693]                                                                                                                                   |
| 7184   | HSP90B1     | Endoplasmic precursor (Heat shock protein 90 kDa beta member 1) (94 kDa glucose-regulated protein) (GRP94) (gp96 homolog) (Tumor rejection antigen 1). [Source:Uniprot/SWISSPROT;Acc:P14625]                                                             |
| 8870   | NP_003888.2 | immediate early response 3 [Source:RefSeq_peptide;Acc:NP_003888]                                                                                                                                                                                         |
| 3460   | IFNGR2      | Interferon-gamma receptor beta chain precursor (Interferon-gamma receptor accessory factor 1) (AF-1) (Interferon-gamma transducer 1). [Source:Uniprot/SWISSPROT;Acc:P38484]                                                                              |
| 3576   | IL8         | Interleukin-8 precursor (IL-8) (CXCL8) (Monocyte-derived neutrophil chemotactic factor) (MDNCF) (T-cell chemotactic factor) (Neutrophil-activating protein 1) (NAP-1) (Protein 3-10C) (Granulocyte chemotactic protein 1) (GCP-1)                        |
| 3693   | ITGB5       | Integrin beta-5 precursor. [Source:Uniprot/SWISSPROT;Acc:P18084]                                                                                                                                                                                         |
| 3959   | LGALS3BP    | Galectin-3-binding protein precursor (Lectin galactoside-binding soluble 3-binding protein) (Mac-2-binding protein) (Mac-2 BP) (MAC2BP) (Tumor-associated antigen 90K). [Source:Uniprot/SWISSPROT;Acc:Q08380]                                            |

|        |          |                                                                                                                                                                                                                                                                |
|--------|----------|----------------------------------------------------------------------------------------------------------------------------------------------------------------------------------------------------------------------------------------------------------------|
| 4061   | LY6E     | Lymphocyte antigen 6E precursor (Ly-6E) (Retinoic acid-induced gene E protein) (RIG-E) (Thymic shared antigen 1) (TSA-1) (Stem cell antigen 2) (SCA-2).<br>[Source:Uniprot/SWISSPROT;Acc:Q16553]                                                               |
| 65108  | MARCKSL1 | MARCKS-related protein (MARCKS-like protein 1) (Macrophage myristoylated alanine-rich C kinase substrate) (Mac-MARCKS) (MacMARCKS). [Source:Uniprot/SWISSPROT;Acc:P49006]                                                                                      |
| 4605   | MYBL2    | Myb-related protein B (B-Myb). [Source:Uniprot/SWISSPROT;Acc:P10244]                                                                                                                                                                                           |
| 4771   | NF2      | Merlin (Moesin-ezrin-radixin-like protein) (Neurofibromin-2) (Schwannomin) (Schwannomerlin).<br>[Source:Uniprot/SWISSPROT;Acc:P35240]                                                                                                                          |
| 652607 | PABPC1   | Polyadenylate-binding protein 1 (Poly(A)-binding protein 1) (PABP 1).<br>[Source:Uniprot/SWISSPROT;Acc:P11940]                                                                                                                                                 |
| 84333  | PCGF5    | Polycomb group RING finger protein 5 (RING finger protein 159).<br>[Source:Uniprot/SWISSPROT;Acc:Q86SE9]                                                                                                                                                       |
| 5111   | PCNA     | Proliferating cell nuclear antigen (PCNA) (Cyclin). [Source:Uniprot/SWISSPROT;Acc:P12004]                                                                                                                                                                      |
| 5329   | PLAUR    | Urokinase plasminogen activator surface receptor precursor (uPAR) (U-PAR) (Monocyte activation antigen Mo3) (CD87 antigen). [Source:Uniprot/SWISSPROT;Acc:Q03405]                                                                                              |
| 5359   | PLSCR1   | Phospholipid scramblase 1 (PL scramblase 1) (Ca(2+)-dependent phospholipid scramblase 1) (Erythrocyte phospholipid scramblase) (MmTRA1b). [Source:Uniprot/SWISSPROT;Acc:O15162]                                                                                |
| 5432   | POLR2C   | DNA-directed RNA polymerase II subunit RPB3 (RNA polymerase II subunit B3) (RNA polymerase II subunit 3) (DNA-directed RNA polymerase II subunit C) (DNA-directed RNA polymerase II 33 kDa polypeptide) (RPB33) (RPB31). [Source:Uniprot/SWISSPROT;Acc:P19387] |
| 5445   | PON2     | Serum paraoxonase/arylesterase 2 (EC 3.1.1.2) (EC 3.1.8.1) (PON 2) (Serum aryl dialkyl phosphatase 2) (A-esterase 2) (Aromatic esterase 2). [Source:Uniprot/SWISSPROT;Acc:Q15165]                                                                              |
| 5473   | PPBP     | Platelet basic protein precursor (PBP) (Small inducible cytokine B7) (CXCL7) (Leukocyte-derived growth factor) (LDGF) (Macrophage-derived growth factor) (MDGF)                                                                                                |
| 5514   | PPP1R10  | Serine/threonine-protein phosphatase 1 regulatory subunit 10 (Phosphatase 1 nuclear targeting subunit) (MHC class I region proline-rich protein CAT53) (FB19 protein) (PP1-binding protein of 114 kDa) (p99). [Source:Uniprot/SWISSPROT;Acc:Q96QC0]            |
| 5836   | PYGL     | Glycogen phosphorylase, liver form (EC 2.4.1.1). [Source:Uniprot/SWISSPROT;Acc:P06737]                                                                                                                                                                         |
| 5880   | RAC2     | Ras-related C3 botulinum toxin substrate 2 precursor (p21-Rac2) (Small G protein) (GX).<br>[Source:Uniprot/SWISSPROT;Acc:P15153]                                                                                                                               |
| 5935   | RBM3     | Putative RNA-binding protein 3 (RNA-binding motif protein 3) (RNPL).<br>[Source:Uniprot/SWISSPROT;Acc:P98179]                                                                                                                                                  |
| 389    | RHOC     | Rho-related GTP-binding protein RhoC precursor (H9). [Source:Uniprot/SWISSPROT;Acc:P08134]                                                                                                                                                                     |
| 6124   | RPL4     | 60S ribosomal protein L4 (L1). [Source:Uniprot/SWISSPROT;Acc:P36578]                                                                                                                                                                                           |
| 6175   | RPLP0    | 60S acidic ribosomal protein P0 (L10E). [Source:Uniprot/SWISSPROT;Acc:P05388]                                                                                                                                                                                  |
| 91543  | RSAD2    | radical S-adenosyl methionine domain containing 2 [Source:RefSeq_peptide;Acc:NP_542388]                                                                                                                                                                        |
| 5054   | SERPINE1 | Plasminogen activator inhibitor 1 precursor (PAI-1) (Endothelial plasminogen activator inhibitor) (PAI). [Source:Uniprot/SWISSPROT;Acc:P05121]                                                                                                                 |
| 29946  | SERTAD3  | SERTA domain-containing protein 3 (Replication protein-binding trans-activator) (RPA-binding trans-activator). [Source:Uniprot/SWISSPROT;Acc:Q9UJW9]                                                                                                           |
| 6774   | STAT3    | Signal transducer and activator of transcription 3 (Acute-phase response factor).<br>[Source:Uniprot/SWISSPROT;Acc:P40763]                                                                                                                                     |
| 7040   | TGFB1    | Transforming growth factor beta-1 precursor (TGF-beta-1) [Contains: Latency-associated peptide]                                                                                                                                                                |

|      |         |                                                                                                                                                                                                                                     |
|------|---------|-------------------------------------------------------------------------------------------------------------------------------------------------------------------------------------------------------------------------------------|
|      |         | (LAP)]. [Source:Uniprot/SWISSPROT;Acc:P01137]                                                                                                                                                                                       |
| 7083 | TK1     | Thymidine kinase, cytosolic (EC 2.7.1.21). [Source:Uniprot/SWISSPROT;Acc:P04183]                                                                                                                                                    |
| 4071 | TM4SF1  | Transmembrane 4 L6 family member 1 (Tumor-associated antigen L6) (Membrane component surface marker 1) (M3S1). [Source:Uniprot/SWISSPROT;Acc:P30408]                                                                                |
| 7127 | TNFAIP2 | Tumor necrosis factor, alpha-induced protein 2 (Primary response gene B94 protein). [Source:Uniprot/SWISSPROT;Acc:Q03169]                                                                                                           |
| 9322 | TRIP10  | Cdc42-interacting protein 4 (Thyroid receptor-interacting protein 10) (TRIP-10) (Protein Felic) (Salt-tolerant protein) (hSTP). [Source:Uniprot/SWISSPROT;Acc:Q15642]                                                               |
| 9246 | UBE2L6  | Ubiquitin/ISG15-conjugating enzyme E2 L6 (EC 6.3.2.19) (Ubiquitin- protein ligase L6) (Ubiquitin carrier protein L6) (UbcH8) (Retinoic acid-induced gene B protein) (RIG-B). [Source:Uniprot/SWISSPROT;Acc:O14933]                  |
| 7374 | UNG     | Uracil-DNA glycosylase (EC 3.2.2.-) (UDG). [Source:Uniprot/SWISSPROT;Acc:P13051]                                                                                                                                                    |
| 9100 | USP10   | Ubiquitin carboxyl-terminal hydrolase 10 (EC 3.1.2.15) (Ubiquitin thioesterase 10) (Ubiquitin-specific-processing protease 10) (Deubiquitinating enzyme 10). [Source:Uniprot/SWISSPROT;Acc:Q14694]                                  |
| 7375 | USP4    | Ubiquitin carboxyl-terminal hydrolase 4 (EC 3.1.2.15) (Ubiquitin thioesterase 4) (Ubiquitin-specific-processing protease 4) (Deubiquitinating enzyme 4) (Ubiquitous nuclear protein homolog). [Source:Uniprot/SWISSPROT;Acc:Q13107] |

### Up-regulated ISGs

| Entrez Gene ID | Gene Symbol | Description                                                                                                                                                                                                                                                   |
|----------------|-------------|---------------------------------------------------------------------------------------------------------------------------------------------------------------------------------------------------------------------------------------------------------------|
| 25841          | ABTB2       | Ankyrin repeat and BTB/POZ domain-containing protein 2. [Source:Uniprot/SWISSPROT;Acc:Q8N961]                                                                                                                                                                 |
| 341            | APOC1       | Apolipoprotein C-I precursor (Apo-CI) (ApoC-I). [Source:Uniprot/SWISSPROT;Acc:P02654]                                                                                                                                                                         |
| 716            | C1S         | Complement C1s subcomponent precursor (EC 3.4.21.42) (C1 esterase) [Contains: Complement C1s subcomponent heavy chain; Complement C1s subcomponent light chain]. [Source:Uniprot/SWISSPROT;Acc:P09871]                                                        |
| 440068         | CASP1       | Caspase-1 precursor (EC 3.4.22.36) (CASP-1) (Interleukin-1 beta convertase) (IL-1BC) (IL-1 beta-converting enzyme) (ICE) (Interleukin- 1 beta-converting enzyme) (p45) [Contains: Caspase-1 p20 subunit; Caspase-1 p10 subunit].                              |
| 6364           | CCL20       | Small inducible cytokine A20 precursor (CCL20) (Macrophage inflammatory protein 3 alpha) (MIP-3-alpha) (Liver and activation- regulated chemokine) (CC chemokine LARC) (Beta chemokine exodus-1) [Contains: CCL20(1-67); CCL20(1-64); CCL20(2-70)].           |
| 629            | CFB         | Complement factor B precursor (EC 3.4.21.47) (C3/C5 convertase) (Properdin factor B) (Glycine-rich beta glycoprotein) (GBG) (PBF2) [Contains: Complement factor B Ba fragment; Complement factor B Bb fragment]. [Source:Uniprot/SWISSPROT;Acc:P00751]        |
| 80347          | COASY       | Bifunctional coenzyme A synthase (CoA synthase) (NBP) (POV-2) [Includes: Phosphopantetheine adenylyltransferase (EC 2.7.7.3) (Pantetheine-phosphate adenylyltransferase) (PPAT) (Dephospho-CoA pyrophosphorylase); Dephospho-CoA kinase (EC 2.7.1.24) (DPCK)] |
| 1390           | CREM        | cAMP-responsive element modulator (Inducible cAMP early repressor) (ICER). [Source:Uniprot/SWISSPROT;Acc:Q03060]                                                                                                                                              |
| 6376           | CX3CL1      | Fractalkine precursor (CX3CL1) (Neurotactin) (CX3C membrane-anchored chemokine) (Small                                                                                                                                                                        |

|        |           |                                                                                                                                                                                                                                                           |
|--------|-----------|-----------------------------------------------------------------------------------------------------------------------------------------------------------------------------------------------------------------------------------------------------------|
|        |           | inducible cytokine D1). [Source:Uniprot/SWISSPROT;Acc:P78423]                                                                                                                                                                                             |
| 731937 | EIF1      | Eukaryotic translation initiation factor 1 (eIF1) (Protein translation factor SUI1 homolog) (Sui1 iso1) (A121). [Source:Uniprot/SWISSPROT;Acc:P41567]                                                                                                     |
| 8334   | HIST1H2AC | Histone H2A type 1-C. [Source:Uniprot/SWISSPROT;Acc:Q93077]                                                                                                                                                                                               |
| 3108   | HLA-DMA   | HLA class II histocompatibility antigen, DM alpha chain precursor (MHC class II antigen DMA). [Source:Uniprot/SWISSPROT;Acc:P28067]                                                                                                                       |
| 3306   | HSPA2     | Heat shock-related 70 kDa protein 2 (Heat shock 70 kDa protein 2). [Source:Uniprot/SWISSPROT;Acc:P54652]                                                                                                                                                  |
| 3308   | HSPA4     | Heat shock 70 kDa protein 4 (Heat shock 70-related protein APG-2) (HSP70RY). [Source:Uniprot/SWISSPROT;Acc:P34932]                                                                                                                                        |
| 3397   | ID1       | DNA-binding protein inhibitor ID-1 (Inhibitor of DNA binding 1). [Source:Uniprot/SWISSPROT;Acc:P41134]                                                                                                                                                    |
| 3429   | IFI27     | Interferon-alpha-induced 11.5 kDa protein (p27) (ISG12(a) protein). [Source:Uniprot/SWISSPROT;Acc:P40305]                                                                                                                                                 |
| 3434   | IFIT1     | Interferon-induced protein with tetratricopeptide repeats 1 (IFIT-1) (Interferon-induced 56 kDa protein) (IFI-56K). [Source:Uniprot/SWISSPROT;Acc:P09914]                                                                                                 |
| 24138  | IFIT5     | Interferon-induced protein with tetratricopeptide repeats 5 (IFIT-5) (Retinoic acid- and interferon-inducible 58 kDa protein). [Source:Uniprot/SWISSPROT;Acc:Q13325]                                                                                      |
| 3665   | IRF7      | Interferon regulatory factor 7 (IRF-7). [Source:Uniprot/SWISSPROT;Acc:Q92985]                                                                                                                                                                             |
| 3669   | ISG20     | Interferon-stimulated gene 20 kDa protein (EC 3.1.13.1) (Promyelocytic leukemia nuclear body-associated protein ISG20) (Estrogen-regulated transcript 45 protein). [Source:Uniprot/SWISSPROT;Acc:Q96AZ6]                                                  |
| 4149   | MAX       | Protein max (Myc-associated factor X). [Source:Uniprot/SWISSPROT;Acc:P61244]                                                                                                                                                                              |
| 4170   | MCL1      | Induced myeloid leukemia cell differentiation protein Mcl-1 (Bcl-2- related protein EAT/mcl1) (mcl1/EAT). [Source:Uniprot/SWISSPROT;Acc:Q07820]                                                                                                           |
| 8202   | NCOA3     | Nuclear receptor coactivator 3 (EC 2.3.1.48) (NCoA-3) (Thyroid hormone receptor activator molecule 1) (TRAM-1) (ACTR) (Receptor-associated coactivator 3) (RAC-3) (Amplified in breast cancer-1 protein) (AIB-1) (Steroid receptor coactivator protein 3) |
| 9111   | NMI       | N-myc-interactor (Nmi) (N-myc and STAT interactor). [Source:Uniprot/SWISSPROT;Acc:Q13287]                                                                                                                                                                 |
| 8204   | NRIP1     | Nuclear receptor-interacting protein 1 (Nuclear factor RIP140) (Receptor-interacting protein 140). [Source:Uniprot/SWISSPROT;Acc:P48552]                                                                                                                  |
| 4938   | OAS1      | 2-5-oligoadenylate synthetase 1 (EC 2.7.7.-) ((2-5)oligo(A) synthetase 1) (2-5A synthetase 1) (p46/p42 OAS) (E18/E16). [Source:Uniprot/SWISSPROT;Acc:P00973]                                                                                              |
| 10133  | OPTN      | Optineurin (Optic neuropathy-inducing protein) (E3-14.7K-interacting protein) (FIP-2) (Huntingtin-interacting protein HYPL) (NEMO-related protein) (Transcription factor IIIA-interacting protein) (TFIIIA- IntP). [Source:Uniprot/SWISSPROT;Acc:Q96CV9]  |
| 51131  | PHF11     | PHD finger protein 11 (BRCA1 C-terminus-associated protein) (Renal carcinoma antigen NY-REN-34). [Source:Uniprot/SWISSPROT;Acc:Q9UIL8]                                                                                                                    |
| 51296  | SLC15A3   | solute carrier family 15, member 3 [Source:RefSeq_peptide;Acc:NP_057666]                                                                                                                                                                                  |
| 8651   | SOCS1     | Suppressor of cytokine signaling 1 (SOCS-1) (JAK-binding protein) (JAB) (STAT-induced STAT inhibitor 1) (SSI-1) (Tec-interacting protein 3) (TIP-3). [Source:Uniprot/SWISSPROT;Acc:O15524]                                                                |
| 3431   | SP110     | Sp110 nuclear body protein (Speckled 110 kDa) (Transcriptional coactivator Sp110) (Interferon-induced protein 41/75). [Source:Uniprot/SWISSPROT;Acc:Q9HB58]                                                                                               |



|       |         |                                                                                                                                                                                             |
|-------|---------|---------------------------------------------------------------------------------------------------------------------------------------------------------------------------------------------|
| 7128  | TNFAIP3 | Tumor necrosis factor, alpha-induced protein 3 (EC 3.4.19.12) (Putative DNA-binding protein A20) (Zinc finger protein A20). [Source:Uniprot/SWISSPROT;Acc:P21580]                           |
| 8717  | TRADD   | Tumor necrosis factor receptor type 1-associated DEATH domain protein (TNFR1-associated DEATH domain protein) (TNFRSF1A-associated via death domain). [Source:Uniprot/SWISSPROT;Acc:Q15628] |
| 11074 | TRIM31  | Tripartite motif-containing protein 31. [Source:Uniprot/SWISSPROT;Acc:Q9BZY9]                                                                                                               |
| 85363 | TRIM5   | Tripartite motif-containing protein 5 (EC 6.3.2.-) (RING finger protein 88). [Source:Uniprot/SWISSPROT;Acc:Q9C035]                                                                          |

From the cDNA microarray data of NRAV-overexpressing cells, 107 differentially expressed ISGs were identified by using the Interferome analysis with parameters human, lung and A549 cell line. 72 down-regulated and 35 up-regulated ISGs are shown.

**Table S3. Mass Spectrometry Analysis of ZONAB, Related to Figure 6**

| Reference                                                                  |                                |            |          |   |      | P (pro)  | Score         | Coverage |
|----------------------------------------------------------------------------|--------------------------------|------------|----------|---|------|----------|---------------|----------|
| Scan(s)                                                                    | Peptide                        | MH+        | DeltaM   | z | Type | P (pep)  | XC            | DeltaCh  |
| <b>ZO-1-associated nucleic acid binding protein (ZONAB) [Homo sapiens]</b> |                                |            |          |   |      | 1.98E-10 | <b>148.30</b> |          |
| 3768                                                                       | R.NDTKEDVFVHQTAIKK.N           | 1874.08736 | -0.07095 | 2 | CID  | 2.05E-07 | 5.12          | 0.51     |
| 3788                                                                       | K.EDVVFVHQTAIKK.N              | 1415.61915 | -0.29085 | 2 | CID  | 4.81E-05 | 3.36          | 0.36     |
| 3831                                                                       | R.PAPAVGEAEDKENQQATSGPNQPSVR.R | 2678.81039 | 0.20204  | 3 | CID  | 1.98E-10 | 3.89          | 0.43     |
| 4062                                                                       | R.NGYGFINRNDTK.E               | 1399.49353 | -0.85896 | 2 | CID  | 2.17E-06 | 3.38          | 0.44     |
| 4171                                                                       | K.DGVPEGAQLQGPVHR.N            | 1560.69644 | 0.80263  | 2 | CID  | 4.17E-07 | 3.37          | 0.52     |
| 4194                                                                       | R.NDTKEDVFVHQTAIK.R            | 1745.91444 | -0.04428 | 2 | CID  | 5.04E-10 | 4.95          | 0.47     |
| 4272                                                                       | K.EDVVFVHQTAIK.R               | 1287.44623 | -0.59780 | 2 | CID  | 1.23E-05 | 3.32          | 0.41     |
| 4273                                                                       | K.GAEAAANVTGPDGVPVEGSR.Y       | 1783.87794 | 1.41825  | 2 | CID  | 2.77E-03 | 3.81          | 0.45     |
| 4339                                                                       | K.VLAKVLGTVK.W                 | 1129.41808 | 0.17279  | 2 | CID  | 9.02E-07 | 3.43          | 0.43     |
| 4384                                                                       | R.NAGEIGEM*KDGVPEGAQLQGPVHR.N  | 2506.73309 | -0.62057 | 3 | CID  | 4.77E-07 | 4.56          | 0.43     |
| 4452                                                                       | R.NGYGFINR.N                   | 941.02532  | -0.10120 | 2 | CID  | 1.21E-04 | 2.69          | 0.43     |
| 4928                                                                       | R.NAGEIGEMKDGVPEGAQLQGPVHR.N   | 2490.73818 | -0.05303 | 3 | CID  | 4.21E-10 | 5.93          | 0.57     |
| 5326                                                                       | R.NGYGFINRNDTKEDVFVHQTAIK.R    | 2667.91717 | 0.16020  | 3 | CID  | 1.05E-09 | 5.21          | 0.43     |
| 6294                                                                       | K.VLGTVKWFNVR.N                | 1319.57943 | 0.33309  | 2 | CID  | 1.50E-07 | 3.27          | 0.48     |
| 8163                                                                       | R.SVGDGETVEFDVVEGEK.G          | 1796.86702 | 0.46457  | 2 | CID  | 5.01E-07 | 4.95          | 0.51     |

**Sequence coverage of ZO-1-associated nucleic acid binding protein (ZONAB)**

MSEAGEATTTTTLTPQAPTEAAAAAPQDPAPKSPVSGAPQAAAAPAAHVAGNPGGDAAPAATGTAAAASLATAAGSEDAEKKVLATKVLGTVKWFNVRNGYGFINRNDTKEDVVFVHQTAIKKNNPRKYLRSVGDGETVEFDVVEGEKGAEAAANVTGPDGVPVEGSR YAADRRRYRRGY YGRRRGPPRNAGEIGEMKDGVPEGAQLQGPVHRNPT YRPRYRSRGPPRP RPAPAVGEAEDKENQQATSGPNQPSVRRGYRRPYN YRRRPRPPNAPSQDGKEAKAGEAPTENPAPPTQSSAE

Mass Spectrometry was performed as described in Supplemental Experimental Procedures. Matched peptides were listed or shown in Red.

## **Supplemental Experimental Procedures**

### **Cells, viruses, and antibodies**

Cells A549, HeLa, K562, 293T, HepG2, SMMC-7721, QGY-7703, BEL-7402, NIH3T3, and Vero were grown in DMEM or RPMI1640 supplemented with 10% (vol/vol) FBS (Gibco) and antibiotics (penicillin and streptomycin) (Invitrogen) at 37 °C in a humidified 5% CO<sub>2</sub> atmosphere as previously described (Guo et al., 2010). Influenza virus A/WSN/33 (H1N1) and Sendai virus (SeV) were propagated in embryonated chicken eggs (Wei et al., 2014). Muscovy Duck Reovirus (MDRV) and Herpes simplex virus (HSV, kindly provided by Prof. Jinhua Yan, Institute of Microbiology, Chinese Academy of Sciences (Zhang et al., 2011)) were propagated in Vero cells. Antibody anti-MxA (Proteintech, 13750-1-AP) is used for Western blot. All other antibodies were obtained as previously described (Wei et al., 2014).

### **Plas mid construction**

The reporter plasmid pGL3-MxAP-FF-Luc carrying the firefly luciferase (FFLuc) gene under the control of the human MxA promoter was kindly provided by Prof. Georg Kochs, Department of Virology, University of Freiburg, Freiburg, Germany (Holzinger et al., 2007). Primers 5'-TTA AAA GGT ACC GAG CCC TGA ACC GGG ACA GTG-3' and 5'-TTT GTC AAG CTT TGG TGT CCA GCG AAG ACC AGC-3' were used to amplify the IFITM3 promoter from A549 genomic DNA (Shen et al., 2013). pGL3-IFITM3P carrying the FF-Luc gene under the control of the IFITM3 promoter was constructed by inserting the IFITM3 promoter into the

XhoI-HindIII sites of pGL3-basic (Promega).

### **Viral infection**

A549 cells were used to infect with IAV WSN, Sendai virus (SeV), or Herpes Simplex Virus (HSV) and 293T cells were infected with Muscovy Duck Reovirus (MDRV). Unless indicated, cells were washed and incubated with virus at a multiplicity of infection (MOI) of 3 for 1 h with medium containing 2 mg/ml TPCK (L-1-tosylamido-2-phenylethyl chloromethyl ketone) -treated trypsin. After adsorption, the supernatant was aspirated and cells were cultured with the medium for 12 h with IAV WSN and SeV, or 24h with MDRV and HSV.

### **Virus titers assay**

Cell culture supernatant was harvested at 16 hpi or indicated time points. Mouse lungs were collected at 6 dpi and homogenized in 1 ml DMEM to prepare tissue suspension. Virus titers in supernatants were determined by a standard Hemagglutination assay (HA) or a plaque forming assay (PFU) on MDCK cells as described previously (Wang et al., 2012).

### **Microarray and data analysis**

The microarray experiments were performed as described previously (Guo et al., 2014; Wang et al., 2012). The lncRNA microarray of WSN infected A549 cells and uninfected control was performed using Human lncRNA 100309 (Arraystar,

Rockville, MD). The cDNA microarray of WSN infected NRAV-overexpressing or control A549 cells (MOI=3,16 hpi). was performed using Human 12x135K microarray (Roche NimbleGen, Madison, WI). Expression data were normalized through quantile normalization and the Robust Multichip Average (RMA) algorithm, and transformed into log<sub>2</sub> value for calculation. The fold changes of up-regulated genes are calculated as  $2^{(\text{mean}[\log_2(T1), \log_2(T2), \log_2(T3)]) / 2^{(\text{mean}[\log_2(C1), \log_2(C2), \log_2(C3)])}$ , and the fold changes of down-regulated genes are calculated as  $2^{(\text{mean}[\log_2(C1), \log_2(C2), \log_2(C3)]) / 2^{(\text{mean}[\log_2(T1), \log_2(T2), \log_2(T3)])}$ . Differentially expressed genes were identified through Volcano Plot filtering between two groups, and the threshold is fold change > 2.0 and  $P < 0.05$ . In heatmaps, log<sub>2</sub> values have been centered and scaled in the row.

### ***In Silico* and Primary Functional Screen of LncRNAs**

To identify lncRNAs from the data of microarray, candidates with higher fold change of expression were selected and subjected an *in silico* analysis of genomic locations and sequences (UCSC, <http://genome.ucsc.edu>, NCBI, <http://www.ncbi.nlm.nih.gov>), and according to the strict criteria that lncRNA should be longer than 200 nt, have little or no ORFs, and localize in genome antisense to, or intronic of, or intergenic (>5kb away) from adjacent protein-coding genes. No protein-coding potential is performed. The functional primary screen is based on the effects of ectopic lncRNA expression on IAV replication. Fragments of lncRNAs amplified from A549 cell were inserted into modified stable expression system as described in **Supplemental Experimental Procedures** and used for exogenous expression. FACS sorted cells

with fluorescence are maintained. After infection with WSN at MOI=0.3 for 16 hours, the virus titers in cell culture supernatants were determined through plaque forming assay.

### **Bioinformatics analysis of non-coding potential**

Non-coding potential is performed through several programs as described previously (Guo et al., 2014). LncRNA sequences are analyzed by using ORF Finder from NCBI (<http://www.ncbi.nlm.nih.gov/gorf/gorf.html>) and coding potential calculator (<http://cpc.cbi.pku.edu.cn>). NRAV homolog sequences from human, chimpanzee, rhesus, guenon pig, and mouse are used for PhyloCSF analysis (Lin et al., 2011) (<https://github.com/mlin/PhyloCSF/wiki>).

### **Sucrose sedimentation and polysome analysis**

The sucrose sedimentation and polysome analysis was performed as previously described (Carpenter et al., 2013; Ricci et al., 2014).  $2 \times 10^7$  A549 cells were pretreated with cycloheximide (CHX, 100  $\mu$ g/ml, Sigma) for 10 min at 37°C or mock treated.

After wash, cells were lysed in 1 ml of lysis buffer (10 mM HEPES-KOH pH 7.4; 5 mM  $MgCl_2$ ; 300 mM KCl; 0.5% NP-40; 2 mM DTT; 100  $\mu$ g/ml CHX (none for control) and 1  $\times$  Protease-Inhibitor Cocktail EDTA-free (Promega)) and incubation at 4°C for 10 min. After centrifugation at 1300 g for 10 min at 4°C, the supernatant was recovered. 10 A260 units of mock lysate were treated with 35 mM of EDTA for 20 min, same amount of CHX-treated lysate were not complemented with EDTA, both

were loaded on top of a 10 to 50% (Weight/Volume) sucrose gradient (20mM HEPES-KOH pH 7.4; 5mM MgCl<sub>2</sub>; 100mM KCl; 2mM DTT; 100 µg/ml CHX) and centrifuged in a SW-41 rotor at 35,000 rpm for 2 h 40 min at 4 °C. After centrifugation, 15 fractions were collected from the top while absorbance at 254nm was measured. Collected fractions were digested with 1% SDS and proteinase K (200 µg/ml) at 42C for 30 min. RNA was extracted and re-suspended in 50 µl of water. qRT-PCR was performed to quantify the NRAV or GAPDH mRNA distribution in sucrose gradient. The relative RNA levels were normalized to input and shown as %input.

### **Cell stimulation, Transient transfections and viral transductions**

For stimulation, cells were incubated for 2-3 h with the recombinant cytokines or peptides at following concentration IFN-β (0-100 ng/ml), IL-29 (50 ng/ml), for 8 h with LPS (100 ng/ml, Invivogen) and sCD14 (300 ng/ml, PeproTech), for 4 h with etoposide (100 µM, Sigma), or cultured in serum-free media, or transfected with 1 µg/ml RNA or poly(I:C) using Lipofectamine 2000 (Invitrogen) according to the manufacturer's instructions. For transient transfection, cells were transiently transfected with 2 µg plasmids per well of 6-well plate by using Lipofectamine 2000 (Invitrogen). Then, cells were cultured for another 24 hours for transient expression. For viral transductions, cells were transduced with pseudovirus packaged by lentivirus expression system with polybrene (8 µg/ml).

## **RT-PCR and Quantitative RT-PCR (qRT-PCR)**

RNA was isolated with the Total RNA Kit (Omega Bio-Tek). Reverse transcription was performed with oligo-dT primers or random primers by using M-MLV (Promega), and quantitative PCR was performed with SuperReal PreMix Plus (SYBR Green) (Tiangen, Beijing, China). The primer sequences are available upon request. For quantification, the  $2^{-\Delta\Delta C_t}$  method was used to calculate the relative RNA levels against GAPDH. Results from three independent experiments were expressed as means  $\pm$  s.e.m.  $P < 0.05$  (two-sided Student's *t*-test) was considered statistically significant.

## **shRNAs**

The shRNA target sequences used in supplemental results are sh-RIG-I: TGC AAT CTT GTC ATC CTT TAT (Jiang et al., 2011), sh-MDA5: CCA ACA AAG AAG CAG TGT ATA (Delaloye et al., 2009), sh-TLR3: CAA CAT AGC CAA CAT AAA T (Salaun et al., 2007), sh-VISA: GGC AGG TCA GTT AAC AAT TTA (Jiang et al., 2011), sh-IRF3: CAT TGT AGA TCT GAT TAC CTT C (Manel et al., 2010), sh-IRF7: GCC TCT ATG ACG ACA TCG AGT, sh-STAT1: GCA AGC GTA ATC TTC AGG ATA (Jiang et al., 2011) and sh-ZONAB: GCA GGT GAC CTA AAG AAT TAA and GGA AGA CTA ACC AAG ATT TG. The efficiency of overexpression or knockdown was confirmed by standard RT-PCR or qRT-PCR.

## **Generation of overexpression and knockdown cell lines**

NRAV coding sequence and other lncRNA sequences were cloned from A549 by



RT-PCR. Primers were designed according to the sequences in database of UCSC (<http://genome.ucsc.edu>) or NCBI (<http://www.ncbi.nlm.nih.gov>). The stable NRAV-overexpressing cells lines were constructed with a retroviral expression system as described previously (Qiu et al., 2012; Wei et al., 2014; Yang et al., 2013). The expression construct is modified by inserting a bovine growth hormone polyadenylation (BGH-polyA) sequence from pcDNA3.1 into XhoI-EcoRI sites before the GFP coding sequence in the vector. The stable knockdown cells of NRAV were generated using a shRNA-based lentivector system pSIH-H1 (System Biosciences) as provider's protocol. The shRNA target sequences used in this paper are sh-NRAV-1: GCC CTT CAG AGT TGT TAC T, sh-NRAV-2: CCT CCG AAC AGA GTA ATG T. The efficiency of overexpression or knockdown was confirmed by standard RT-PCR or qRT-PCR.

### **Transgenic mice and virus challenge**

The NRAV transgenic C57BL/6 mice (TG) were created as previously described (Lu et al., 2012; Wang et al., 2014; Wei et al., 2014). The NRAV genotype was verified by PCR. The NRAV expression was determined by RT-PCR of mouse tissue after euthanasia. Transgenic lines with high expression were maintained and used in this study. The C57BL/6 wild-type (WT) and NRAV-expressing TG mice (5–6 weeks of age, 5-13 mice/group) were inoculated intranasally with or without  $10^3$  PFU (about  $0.5 \times LD_{50}$  for WT mice) of WSN diluted in 50  $\mu$ L of sterile phosphate buffer saline (PBS). Mice were weighted daily to monitor signs of illness for a period of 14 days.

Mouse lungs (13 mice/group) were collected on 6 dpi and used for further examination. Lung viral loads were measured by standard plaque forming assay, and mouse ISGs mRNA levels in lung were quantified by real-time RT-PCR and RT-PCR. Haematoxylin and Eosin (HE) staining of mouse lung was performed as previously described (Wang et al., 2014).

### **ISGs transient expression experiment**

The transient expression of exogenous human IFIT2, IFIT3, IFITM3 and MxA were performed on NRAV-overexpressing and EV cells by transfecting with plasmids of these ISGs (1 µg/well in 6-well plate) for 24 hours, and followed with IAV infection for 16 hours. The relative virus titer (% of control EV cells) in the culture supernatant of NRAV cells and EV cells was calculated based on the virus titers determined by plaque forming assay. The empty transient expression plasmid was used as control, as well as the expression plasmid of DDX3X. The transient expression efficiency was determined by RT-PCR 24 hours after transfection with expression plasmid containing the coding sequence.

### **Subcellular fractionation**

Cytoplasmic and nuclear fractions were separated as described previously (Yoon et al., 2012). Briefly, A549 cells were lysed with TD buffer (25 mM Tris-HCl pH 7.4; 100 mM NaCl; 5 mM KCl; and 0.7mM Na<sub>2</sub>HPO<sub>4</sub>) containing 1% NP-40 for 5 min. The lysates were centrifuged with 12,000 rpm for 5 min at 4°C. The supernatant was

collected and used for the cytoplasmic fraction. The nuclear pellets were washed with TD buffer containing 0.5% NP-40 on ice for 5 min and collected after centrifugation at 4°C for 5 min at 12,000 rpm.

### **Luciferase assay**

Luciferase assay was performed as previously described (Wei et al., 2014). Briefly, 293T cells stably expressing NRAV in 24-well plate were cotransfected with 0.8 µg of pGL3-MxAP or pGL3-IFITM3P, and 30ng of a Renilla luciferase plasmid (pRL-TK, Promega). Luciferase activity was measured using the dual-luciferase reporter assay system according to the manufacturer's instruction (Promega).

### **5-Aza-2'-deoxycytidine treatment**

Cells were treated with or without 10 µM DNA methyltransferase inhibitor 5-Aza-2'-deoxycytidine (decitabine; DAC, Sigma) for 2 days, and supplemented with fresh DAC every 24h. Treated cells were infected with virus (WSN, SeV, MDRV or HSV, MOI=3) for 12 ~ 24 h. RNAs were isolated using Trizol reagent (Tiangen, Beijing, China), reverse transcription were performed using oligo-dT primers and mRNA levels were detected by RT-PCR or qRT-PCR.

### **RNA stabilization assays**

The mRNA expression of MxA in A549 cells were induced by infection with WSN at MOI=1 for 12 h. The infected cells were treated with actinomycin D (ActD, Sigma) at

2.5 µg/ml and collected at 0, 4, 12, 20 h time points. RNAs were extracted using Trizol reagent (Tiangen, Beijing, China), reverse transcription were performed using oligo-dT primers and mRNA levels were determined by RT-PCR or qRT-PCR.

### **Chromatin immunoprecipitation (ChIP)**

A549 cells expressing NRAV or EV control were infected with WSN (MOI=1, 12 hpi) and were subjected to ChIP assays using the Magna ChIP A/G chromatin immunoprecipitation kit (Millipore) following the manufacturer's instruction. Briefly,  $10^7$  cells were fixed and lysed in 500µl lysis buffer. Nucleus fraction were pelleted and resuspended in 300 µl nucleus lysis buffer, followed by sonication. Sheared chromatin was immunoprecipitated with 3 µg anti-H3K4me3 (Millipore; 17-614), anti-H3K27me3 (Millipore; 07-449) or IgG control (Millipore) antibody and 20µl magnetic beads at 4°C for 4 h to overnight. To reverse the cross-links, protein digestion with proteinase K and 0.2 M NaCl were performed. Immunoprecipitated DNA was purified and quantified by qPCR analysis using SYBR Green Supermix (Tiangen). Primers used locate in intron3-exon4 of *mxA* (transcription start site for MxA isoform 2) and exon1 of *ifitm3*. The primer sequences used for the *mxA* gene are 5' CCG AGC TGG GCA ATT GG 3' and 5' TCC TGG CCG GCA ACT G 3'), for *ifitm3* are 5' AAA GGG AGG GCT CAC TGA GAA 3' and 5' CAC CTC GTG CTC CTC CTT GA 3', for *gapdh* are 5' TAC TAG CGG TTT TAC GGG CG 3' and 5' TCG AAC AGG AGG AGC AGA GAG CGA 3', for *dynll1* are 5' GAG CCC GGT CTC ACC GTG GA 3' and 5' GAT GCG CCA CGG CTT CGG TA 3' (Jurado et al.,

2012). Modified histone enrichment in the ChIP samples were normalized to the input DNA and was calculated as  $2^{-\Delta\Delta Ct}$  with normalization against IgG control. Experiments were performed at least three times with independent chromatin samples.

### **RNA pull-down assay and *Mass Spectrometry***

Three pairs of antisense DNA probes of 20-30 bp binding with NRAV and scramble probes were synthesized and labeled with biotin.  $10^8$  uninfected A549 cells were lysed in 7ml ice-cold IP Lysis buffer (25mM Tris-HCl pH 7.4; 150mM NaCl; 1mM EDTA; 1% NP-40 and 5% glycerol) complemented with 1 × Protease-Inhibitor Cocktail EDTA-free (Promega) and 7μl of Ribolock RNase inhibitor (Thermo) and incubated on ice for 30min. Supernatant of lysates were incubated with 0.5 nmole of NRAV antisense probes or scramble control probes for 3 h at 4°C followed by incubation with Streptavidin Dynabeads (Invitrogen) overnight. RNA/protein interacting complexes were immunoprecipitated and visualized by silver-staining (Pierce silver stain kit, Thermo). Specific bands were excised and trypsin digested. LC-MS/MS analysis was performed using a ThermoFisher Finnigan LTQ linear ion trap Mass Spectrometer in line with a ThermoFisher Finnigan Surveyor MS Pump Plus HPLC system (Beijing Regional center of life science instrument, Chinese Academy of Sciences). The raw MS data were analyzed using SEQUEST v.28 against NCBI human protein database and results were filtered, sorted, and displayed using the Bioworks 3.2.

### **RNA immunoprecipitation (RIP)**

$2 \times 10^7$  uninfected A549 cells were lysed in 200  $\mu$ l of ice-cold IP lysis buffer as described in RNA pull-down assay. Lysate was 5 to 10-fold diluted in 1 ml RIP buffer (25 mM Tris-HCl pH 7.4; 150 mM KCl; 5 mM EDTA; 0.5 mM DTT; 0.5% NP-40; 100 U/ml RNase inhibitor (Thermo) and 1  $\times$  Protease-Inhibitor Cocktail EDTA-free (Promega)) and incubated with 10  $\mu$ g anti-ZONAB antibody (Bioss, Beijing) or rabbit IgG control (Millipore) overnight at 4°C as previously described (Tsai et al., 2010). Lysate was then incubated with Protein A Dynabeads (Invitrogen) for 3 h at 4°C. RNA/protein complexes were immunoprecipitated and RNA was extracted and measured with qRT-PCR. The relative RNA levels were normalized to input and the fold enrichment was calculated as  $2^{-\Delta\Delta Ct}$  with normalization to IgG control.

### **Prediction of CpG island and transcription factor binding**

The prediction data of CpG island in NRAV promoter region and binding sites of transcription factors were from UCSC genome browser database (February 2009 human reference sequence (GRCh37)) (Karolchik et al., 2014).

## Supplemental References

- Delaloye, J., Roger, T., Steiner-Tardivel, Q.G., Le Roy, D., Knaup Reymond, M., Akira, S., Petrilli, V., Gomez, C.E., Perdiguero, B., Tschopp, J., *et al.* (2009). Innate immune sensing of modified vaccinia virus Ankara (MVA) is mediated by TLR2-TLR6, MDA-5 and the NALP3 inflammasome. *PLoS pathogens* 5, e1000480.
- Guo, G., Qiu, X., Wang, S., Chen, Y., Rothman, P.B., Wang, Z., Chen, Y., Wang, G., and Chen, J.L. (2010). Oncogenic E17K mutation in the pleckstrin homology domain of AKT1 promotes v-Abl-mediated pre-B-cell transformation and survival of Pim-deficient cells. *Oncogene* 29, 3845-3853.
- Holzinger, D., Jorns, C., Stertz, S., Boisson-Dupuis, S., Thimme, R., Weidmann, M., Casanova, J.L., Haller, O., and Kochs, G. (2007). Induction of MxA gene expression by influenza A virus requires type I or type III interferon signaling. *Journal of virology* 81, 7776-7785.
- Jiang, L.J., Zhang, N.N., Ding, F., Li, X.Y., Chen, L., Zhang, H.X., Zhang, W., Chen, S.J., Wang, Z.G., Li, J.M., *et al.* (2011). RA-inducible gene-1 induction augments STAT1 activation to inhibit leukemia cell proliferation. *Proceedings of the National Academy of Sciences of the United States of America* 108, 1897-1902.
- Jurado, S., Conlan, L.A., Baker, E.K., Ng, J.L., Tennis, N., Hoch, N.C., Gleeson, K., Smeets, M., Izon, D., and Heierhorst, J. (2012). ATM substrate Chk2-interacting Zn<sup>2+</sup> finger (ASCIZ) is a bi-functional transcriptional activator and feedback sensor in the regulation of dynein light chain (DYNLL1) expression. *The Journal of biological chemistry* 287, 3156-3164.
- Karolchik, D., Barber, G.P., Casper, J., Clawson, H., Cline, M.S., Diekhans, M., Dreszer, T.R., Fujita, P.A., Guruvadoo, L., Haeussler, M., *et al.* (2014). The UCSC Genome Browser database: 2014 update. *Nucleic acids research* 42, D764-770.
- Lu, D., Ma, Y., Zhang, W., Bao, D., Dong, W., Lian, H., Huang, L., and Zhang, L. (2012). Knockdown of cytochrome P450 2E1 inhibits oxidative stress and apoptosis in the cTnT(R141W) dilated cardiomyopathy transgenic mice. *Hypertension* 60, 81-89.
- Manel, N., Hogstad, B., Wang, Y., Levy, D.E., Unutmaz, D., and Littman, D.R. (2010). A cryptic sensor for HIV-1 activates antiviral innate immunity in dendritic cells. *Nature* 467, 214-217.
- Qiu, X., Guo, G., Chen, K., Kashiwada, M., Druker, B.J., Rothman, P.B., and Chen, J.L. (2012). A requirement for SOCS-1 and SOCS-3 phosphorylation in Bcr-Abl-induced tumorigenesis. *Neoplasia* 14, 547-558.
- Ricci, E.P., Kucukural, A., Cenik, C., Mercier, B.C., Singh, G., Heyer, E.E., Ashar-Patel, A., Peng, L., and Moore, M.J. (2014). Stauf1 senses overall transcript secondary structure to regulate translation. *Nature structural & molecular biology* 21, 26-35.
- Salaun, B., Lebecque, S., Matikainen, S., Rimoldi, D., and Romero, P. (2007). Toll-like receptor 3 expressed by melanoma cells as a target for therapy? *Clinical cancer research : an official journal of the American Association for Cancer Research* 13, 4565-4574.
- Shen, C., Wu, X.R., Jiao, W.W., Sun, L., Feng, W.X., Xiao, J., Miao, Q., Liu, F., Yin, Q.Q., Zhang, C.G., *et al.* (2013). A functional promoter polymorphism of IFITM3 is associated with susceptibility to pediatric tuberculosis in Han Chinese population. *PLoS one* 8, e67816.
- Tsai, M.C., Manor, O., Wan, Y., Mosammammarast, N., Wang, J.K., Lan, F., Shi, Y., Segal, E., and Chang, H.Y. (2010). Long noncoding RNA as modular scaffold of histone modification complexes. *Science* 329, 689-693.
- Wang, S., Li, H., Chen, Y., Wei, H., Gao, G.F., Liu, H., Huang, S., and Chen, J.-L. (2012). Transport of

influenza virus neuraminidase (NA) to host cell surface is regulated by ARHGAP21 and Cdc42 proteins. *Journal of Biological Chemistry* 287, 9804-9816.

Yang, J., Wang, J., Chen, K., Guo, G., Xi, R., Rothman, P.B., Whitten, D., Zhang, L., Huang, S., and Chen, J.L. (2013). eIF4B phosphorylation by Pim kinases plays a critical role in cellular transformation by Abl oncogenes. *Cancer research* 73, 4898-4908.

Yoon, J.H., Abdelmohsen, K., Srikantan, S., Yang, X., Martindale, J.L., De, S., Huarte, M., Zhan, M., Becker, K.G., and Gorospe, M. (2012). LincRNA-p21 suppresses target mRNA translation. *Molecular cell* 47, 648-655.

Zhang, N., Yan, J., Lu, G., Guo, Z., Fan, Z., Wang, J., Shi, Y., Qi, J., and Gao, G.F. (2011). Binding of herpes simplex virus glycoprotein D to nectin-1 exploits host cell adhesion. *Nature communications* 2, 577.
